# Supplementary material for: Care home resident and staff perceptions of the acceptability of nutrition intervention trial procedures: a qualitative study embedded within a cluster randomised feasibility trial
Source: PubMed Central journal article supplement — BMJ Open. 2018 Jul 19;8(7):e022307. doi: 10.1136/bmjopen-2018-022307 (PMC6059282; doi:10.1136/bmjopen-2018-022307), 2018-07-19
Supplement: bmjopen-2018-022307.draft_revisions.pdf [file bmjopen-2018-022307.draft_revisions.pdf]

# BMJ Open

BMJ Open is committed to open peer review. As part of this commitment we make the peer review history of every article we publish publicly available.

When an article is published we post the peer reviewers' comments and the authors' responses online. We also post the versions of the paper that were used during peer review. These are the versions that the peer review comments apply to.

The versions of the paper that follow are the versions that were submitted during the peer review process. They are not the versions of record or the final published versions. They should not be cited or distributed as the published version of this manuscript.

BMJ Open is an open access journal and the full, final, typeset and author-corrected version of record of the manuscript is available on our site with no access controls, subscription charges or pay-per-view fees (<http://bmjopen.bmj.com>).

If you have any questions on BMJ Open's open peer review process please email [info.bmjopen@bmj.com](mailto:info.bmjopen@bmj.com)

# BMJ Open

## Care home resident and staff perceptions of the acceptability of nutrition intervention trial procedures: a qualitative study embedded within a cluster randomised feasibility trial

|                               |                                                                                                                                                                                                                                                                                                    |
|-------------------------------|----------------------------------------------------------------------------------------------------------------------------------------------------------------------------------------------------------------------------------------------------------------------------------------------------|
| Journal:                      | <i>BMJ Open</i>                                                                                                                                                                                                                                                                                    |
| Manuscript ID                 | bmjopen-2018-022307                                                                                                                                                                                                                                                                                |
| Article Type:                 | Research                                                                                                                                                                                                                                                                                           |
| Date Submitted by the Author: | 13-Feb-2018                                                                                                                                                                                                                                                                                        |
| Complete List of Authors:     | Stow, Ruth; Birmingham City University, School of Health Sciences<br>Smith, Christina; University College London, 2. Language and Cognition,<br>Division of Psychology and Language Sciences,<br>Rushton, Alison; University of Birmingham School of Sport Exercise and<br>Rehabilitation Sciences |
| Keywords:                     | Nutritional support < ONCOLOGY, Malnutrition, Care homes, Older adults,<br>GERIATRIC MEDICINE, Focus groups                                                                                                                                                                                        |
|                               |                                                                                                                                                                                                                                                                                                    |

SCHOLARONE™  
Manuscripts

Peer Review Only

# Care home resident and staff perceptions of the acceptability of nutrition intervention trial procedures: a qualitative study embedded within a cluster randomised feasibility trial

Ruth Stow<sup>1</sup>, Christina H Smith<sup>2</sup>, Alison Rushton<sup>3</sup>

## Author Affiliations

1. School of Health Sciences, Birmingham City University, Birmingham, UK
2. Language and Cognition, Division of Psychology and Language Sciences, University College London, London, UK
3. School of Sport, Exercise and Rehabilitation Sciences, University of Birmingham, Birmingham, UK

Correspondence to:

Ruth Stow: [ruth.stow@bcu.ac.uk](mailto:ruth.stow@bcu.ac.uk)

## Abstract

**Objectives** To examine care home resident and staff perceptions of the acceptability of participating in a feasibility trial evaluating nutritional interventions in the treatment of malnutrition.

**Design** Phenomenological methodology was used to gather descriptions of resident and staff perceptions of trial procedures, using semi-structured interviews with residents and focus groups with staff. The interviews were used to explore individual perceptions of the acceptability of the assigned intervention and the outcomes measured. Focus groups were used to explore staff experiences of trial participation, and perspectives of nutritional support interventions.

**Setting** The study was embedded within a cluster randomised feasibility trial, which randomised six care homes to provide standard care (SC), food-based intervention (FB), or oral nutritional supplement intervention (ONS) to residents with, or at risk of, malnutrition.

**Participants** Residents in the trial with capacity to consent (n=7) formed the sampling frame for inclusion. Four agreed to be approached by the researcher and to take part in the individual interviews. All were women, representing two arms of the trial (ONS and SC). Twelve staff participated in six focus groups, one at each care home. All participants were women, representing all three arms of the trial.

**Results** Major themes that emerged from both interviews and focus groups included: the perceived acceptability of trial involvement, the value of residents completing Participant Reported Outcome Measures (PROMs) and the challenges associated with outcomes measurement in this setting. Themes that emerged from the focus groups alone, included: the importance of individualising an intervention, and the perceived value of FB and ONS interventions and dietetic input.

**Conclusions** Residents and staff perceived involvement in a trial evaluating nutritional interventions to be acceptable, although the challenges associated with research in this setting were acknowledged. Resident preferences were highlighted by staff as an important consideration when implementing a nutrition support plan.

1  
2  
3 Trial registration number: Current Controlled Trials ISRCTN38047922 , Date  
4 assigned: 22 April 2014  
5  
6

### 7 Strengths and Limitations of this study:

- 9 • This is the first study to inform understanding of the feasibility and acceptability of  
10 conducting a clinical trial evaluating nutritional interventions in the care home setting  
11 from the perspectives of staff and residents.
- 12 • Use of individual interviews allowed for the discussion of personal feelings with  
13 residents and gave each the chance to freely voice their views.
- 14 • The dynamic interaction of the staff focus groups were perceived by the researcher as  
15 open and positive, and provided insight into shared viewpoints within and between  
16 care home sites.
- 17 • The study was limited by small sample size, particularly with regards the number of  
18 residents interviewed, but a staff focus group was conducted at each care home site,  
19 providing representativeness from each arm of the trial, and capturing the views of  
20 both nursing and care staff.
- 21 • Exploration of staff experiences of feasibility and acceptability was carried out in  
22 engaged and motivated care homes, which may limit transferability to the national  
23 care home population.  
24

25  
26 **Funding** This study was undertaken as a student project (RS was the MRes student), as  
27 part of the National Institute for Health Research (NIHR) Clinical Academic Training  
28 Programme for AHP's (Masters in Research). The study was self-funded and involved no  
29 research costs for the NHS trust sponsoring the research (The Heart of England NHS  
30 Foundation Trust).  
31

32 **Competing Interests** None declared.  
33

34 **Authors' contributions** RS designed the study, performed the interviews and focus  
35 groups and drafted the article. RS analysed the data following peer debriefing and  
36 agreement of the final themes with AR. AR and CS have made substantial contributions to  
37 the conception and design of the study. All authors have read and approved the final  
38 manuscript.  
39  
40  
41  
42  
43  
44  
45  
46  
47  
48  
49  
50  
51  
52  
53  
54  
55  
56  
57  
58  
59  
60

## Introduction

Care home residents in the UK are a distinct group of approximately 416,000 people (including 16% of those aged over 85)[1] with different mortality[2], health status, and health and care needs[3] compared to individuals of the same age residing in their own homes. Research outcomes established for older adults living within their own homes cannot be considered valid for care home residents and cannot therefore be used to guide best practice.[4]

The public health and social care expenditure associated with malnutrition in England from 2011-2012, was estimated using the Malnutrition Universal Screening Tool (MUST) as £19.6 billion; 15% of the total expenditure on health and social care[5]. Approximately 30-42% of care home residents are estimated to be at risk of malnutrition,[6-8] placing them at increased risk of infection and pressure ulcers, clinical complications and depression and reducing their overall quality of life.[9-10] There is a need therefore to improve the evidence based nutritional care provided to this population. However, research in care homes presents challenges, and consequently many studies exclude care home residents on the basis that their inclusion would present the team with ethical and practical dilemmas.[11] Recruitment difficulties due to physical and cognitive impairments[12] have been highlighted as a particular challenge, along with the consent process,[12-13] responding to family and carer concerns[12] and high attrition.[12,14] Additional issues for the researcher can include data collection within a busy care home schedule and difficulties for staff in adhering to assigned interventions and methodological protocols.[12] These challenges have led to nutrition intervention trials often excluding those at highest risk of malnutrition, including residents with advanced dementia and immobility.[15-18]

Existing studies of nutrition interventions for malnutrition within this setting have also tended to use a quantitative approach, which whilst useful for determining quantitative outcomes such as nutrient intake and weight change, have provided limited information on resident and staff perspectives of nutritional care and the reasons why the care home environment poses challenges for the researcher. During the last 20 years, researchers have identified the need for employing a range of methodologies to enhance understanding of healthcare complexities and to ensure that disempowered groups are heard.[19] Exploring feasibility outcomes with trial participants is a way to ensure that resident and staff perspectives can be used to inform the design and conduct for future definitive trials in this complex research setting.

The aim of this study therefore, was to seek an in depth understanding of the experience of participating in a cluster randomised feasibility trial which evaluated nutritional interventions in the treatment of malnutrition.[8] The study had two objectives:

1. To examine perceptions of the acceptability of trial procedures (including the intervention protocol, outcome measures and data collection methods) with care home staff and residents.
2. To examine care home staff perspectives of nutritional interventions and dietetic care in the treatment of malnutrition.

## Methods

### **Theoretical Framework:**

Phenomenology was selected as the methodological approach for this study, because it aimed to gather descriptions of resident and staff perceptions of the trial procedures in order to understand the reality of their lived experiences from their own individual perspectives. The Phenomenological research method is considered particularly suitable for researchers aiming to investigate and describe people's perceptions, perspectives and understandings of a particular 'real world' experience.[20-21] The study is reported in line with the Consolidated Criteria for Reporting Qualitative Research (COREQ).[22]

### **Design and setting:**

A pragmatic approach to qualitative research, using semi structured interviews with residents and focus groups with staff was embedded within a cluster randomised feasibility trial (ISRCTN38047922)[8] to understand the experience of participating in a trial investigating nutritional interventions in the treatment of malnutrition. Individual perceptions of the acceptability of the trial procedures and the nutritional intervention and care, were explored and collected with residents and staff.

The feasibility trial was conducted within the West Midlands, in England where 17 care homes providing accommodation for older adults (over 65 years), were receiving regular dietetic input. This was being provided by the community nutrition support dietetic service where the lead researcher (female) (RS) was working as a dietitian at the time of the study. Purposive sampling was used to select and invite six, privately owned care homes with a diverse sample based on type of care provided (residential or nursing/nursing and residential) to take part in the trial. All care home sites were made aware that the trial was being conducted as part of a student MRes project by the Lead Researcher (RS). Residents with or at risk of malnutrition were identified across the six sites over 4 months and homes were cluster randomised to receive standard care (SC) (n=2), food-based intervention (FB) (n=2) or oral nutritional supplement intervention (ONS) (n=2), for 6 months. Outcomes were trial feasibility and the acceptability of the design, the nutritional interventions and the outcomes being assessed at 3 and 6-months. These included anthropometry, dietary intake, healthcare resource usage and participant reported outcome measures (PROMs).

### **Semi-structured interviews:**

The dietitian researcher (RS) conducted individual semi-structured interviews lasting 30 to 60 minutes with care home residents to enable exploration of reality from narratives related to their own experiences of trial participation.[23] The interviews were organised around topic guides (Table 1), developed using the trial feasibility objectives and discussions with care home staff. The basic research question explored was the experience and acceptability of participation in the trial. Themes and core questions were refined following the 6-month dietary intervention and the collection of PROMs.

Interviews allowed for greater exploration of individual perceptions of the acceptability of the assigned intervention and understanding and perception of the anthropometric assessments and the PROMs questionnaires than would have been possible with the use of focus groups.[24-26] RS is an experienced nutrition support dietitian with an interest in malnutrition in the older adult population, and who had worked for several years with the care home population. This relevant background allowed for the effective exploration of individual dietary satisfaction whilst on the allocated nutritional intervention plan. Use of the interview technique enabled residents to ask for questions to be further explained, which allowed for the identification of any problems with comprehension and for

questions to be rephrased as appropriate. This was felt to be important with the care home population and may have been less feasible within a group setting.[27] RS was responsible for audio taping the interviews, and transcribing the audio recordings verbatim.

### Focus Groups:

The dietitian researcher (RS,) led and audio-taped focus group discussions lasting 45-60 minutes in each of the 6 care homes with between 2 and 3 care home staff in each. The topic guide (Table 1) was developed using the feasibility objectives from the trial alongside discussions with care home staff and was later refined following delivery of the 6-month nutritional intervention and collection of outcomes data. Focus groups were used to enable the views of more people to be included,[23] to highlight any variations in perspectives between the staff within each home and between care home types[28] and to collect information from those staff that were reluctant to be interviewed on their own or who felt they had less to contribute.[29-30] As the staff within a care home work closely together, holding a focus group within each individual home was found to stimulate engagement and discussion[29,31] and it was possible to explore knowledge, experiences and perceptions of participating in a trial, with a focus on the assigned intervention and protocol for delivery, the data collection process, the data collection tools and the outcomes from the trial. With a strong background in nutrition support within the care home setting and a working relationship with the care home staff as a dietetic practitioner, RS was able to appreciate the significance of the aspects discussed and to effectively follow up on the relevant points.[32] RS was responsible for transcribing the focus group audio recordings verbatim.

**Table 1: Topic Guides for semi-structured interviews and Focus Groups**

| SEMI-STRUCTURED INTERVIEWS                        |                                                                                                                                                                                                                                                                                                                                                                                                      |
|---------------------------------------------------|------------------------------------------------------------------------------------------------------------------------------------------------------------------------------------------------------------------------------------------------------------------------------------------------------------------------------------------------------------------------------------------------------|
| Stage                                             | Content                                                                                                                                                                                                                                                                                                                                                                                              |
| Discussion on involvement in the trial            | - The clarity and acceptability of explanations and instructions before and during the trial- <i>Prompted for any examples where information was not clear, scope for improvement</i>                                                                                                                                                                                                                |
| Discussion on the dietary plan received           | - The acceptability of the dietary plan- <i>Prompted on appetite, satisfaction with diet, compliance and whether intervention was always received</i><br>- Positive and negative outcomes of the interventions- <i>Personal experiences</i>                                                                                                                                                          |
| Discussion on the anthropometry assessments       | - Acceptability of the assessments undertaken- <i>Prompted for: understanding of instructions, personal experiences, suggestions to make the process more acceptable</i>                                                                                                                                                                                                                             |
| Discussion on the PROMS questionnaires and scales | - The ease/burden of completing questionnaires and scales- <i>Prompted for time commitments, changes to routine, ways to make the process more acceptable</i><br>- Understanding of the questionnaires/scales- <i>Prompted for any particular challenges, whether other residents could have completed</i><br>- Thoughts on the importance of residents being able to provide feedback through PROMs |
| FOCUS GROUPS                                      |                                                                                                                                                                                                                                                                                                                                                                                                      |
| Stage                                             | Content                                                                                                                                                                                                                                                                                                                                                                                              |

|                                                                |                                                                                                                                                                                                                                                                                                                                                                                                                                                                                                                      |
|----------------------------------------------------------------|----------------------------------------------------------------------------------------------------------------------------------------------------------------------------------------------------------------------------------------------------------------------------------------------------------------------------------------------------------------------------------------------------------------------------------------------------------------------------------------------------------------------|
| <p><b>Discussion of care home involvement in the trial</b></p> | <ul style="list-style-type: none"> <li>- The ease/burden of participation in the trial: <i>prompted for time commitments, knowledge and competency</i></li> <li>- The confidence of the staff in completing malnutrition screening- <i>prompted for areas of concern/adequacy of training prior to commencement</i></li> <li>- Experiences of completing healthcare resource usage questionnaires- <i>prompted for time commitment/specific challenges/any other items which could have been included</i></li> </ul> |
| <p><b>Discussion of allocated dietary intervention</b></p>     | <ul style="list-style-type: none"> <li>- The acceptability of the dietary plan for residents</li> <li>- The ease/burden of delivering the dietary intervention</li> <li>- Positive and negative outcomes of interventions- <i>according to study data, and own perceptions</i></li> <li>- Possible reasons for poor compliance</li> </ul>                                                                                                                                                                            |
| <p><b>Discussion of PROMs outcome measures</b></p>             | <ul style="list-style-type: none"> <li>- The ability of residents to complete the questionnaires and scales- <i>prompted for their thoughts on whether others could have completed, ways to make it easier, completion by proxy</i></li> </ul>                                                                                                                                                                                                                                                                       |

## Participants

### Sampling and recruitment

Those residents with capacity to consent who had indicated on the trial consent form that they would like to be considered for individual interviews and had completed the 6-month intervention (n=7), formed the sampling frame for potential inclusion. The care home staff made the initial approach to the 7 potential participants to discuss their involvement. Those that remained interested in participation (n=4) were introduced to the dietitian researcher (RS), to provide further verbal and written information. The 3 residents that declined to take part, did not give specific reasons to the care home staff.

A focus group of staff (2-3) took place within each of the care home sites that had participated in the trial. Care Home staff were selected on the basis that they had participated in the trial.[33] Six focus groups, covering all 3 arms of the trial were conducted.

### Nutritional interventions and outcome measures

All six care homes had received training and support to provide a standard care intervention to residents with or at risk of malnutrition. The food-based intervention choices and recipes were based on local nutrition support guidelines, national guidance and best practice resources[34-35] and were intended to increase the participating resident's daily nutritional intake by approximately 600 kcal and 20-25g of protein. The Oral Nutritional Supplement (ONS) intervention consisted of 2 daily liquid ONS containing 600kcal and 24g protein.

The outcomes measured or collected in the trial by the care home staff included height, weight, Body Mass Index (BMI), healthcare resource usage, compliance with the assigned intervention and completion of the standardised mini-mental state examination (sMMSE). Participant-reported outcome measures (PROMs) data was collected from those residents that had capacity and had consented to completing quality of life and health state questionnaires and a Visual Analogue Scale (VAS) related to dietary satisfaction.



## Ethical approval

The trial was approved by the West Midlands NHS Local Research Ethics Committee (Ref: 13/WM/0390) and the Research and Development Department of the Heart of England NHS Foundation Trust prior to commencement. The Research Ethics Committee felt that the inclusion of residents lacking capacity in the collection of PROMs and in the qualitative study could not be justified in accordance with the Mental Capacity Act.[36] Written consent was sought on an individual basis from eligible residents assessed as having functional capacity. Residents were provided with a full explanation of their required participation alongside a Participant Information Sheet. They were given one week to ask questions and decide whether they would like to provide information on quality of life, health state and dietary satisfaction. Each resident was asked to sign a consent form for PROMs and to indicate whether they would like to be considered for the individual interviews in the qualitative study. Separate Information sheets and consent forms for the qualitative phase were presented to eligible residents and staff prior to their inclusion and any questions were answered. Participants provided written informed consent.

## Data Analysis

Interview and focus group discussions continued until data saturation was felt to be complete. The qualitative data were analysed using the Krueger (1994)[37], and Ritchie and Spencer (1994)[38] framework analyses. The process of data analysis began during data collection, through the effective facilitation and audiotaping of the interview and focus group discussions. As RS undertook all of the interviews and focus groups, this reduced the time taken to become fully familiar with the data.[23] RS transcribed the audiotapes and then cross referenced the transcripts against the recordings for accuracy and to identify the major themes. Concepts, ideas and short phrases were identified within the text and were used to develop thematic frameworks. The initial frameworks and themes were informed by the study objectives and the structure of the topic guides and were developed through deductive analyses and the identification of subthemes. These were then refined, combined and developed by annotating the themes from the draft frameworks on the transcripts, further immersing RS in the data, and enabling the themes and sub-themes to be adjusted and made clearer.[23,39]

Once the frameworks had been refined, the data was indexed using a process of sorting, highlighting and arranging quotations (Using CH1 to CH6 to indicate the care home source and R1 to R4 to indicate the source of the resident interview quotations). At this stage, RS consulted with AR in a process of peer debriefing, to determine whether the themes and subthemes were appropriately clear and comprehensive and to agree the final frameworks.[40] The last stage of analysis involved mapping and interpreting the data, enabling comparison of themes and sub-themes and cross checking against the original transcripts and audio recordings to ensure appropriate context and enhancing rigour.[41] No further changes were made to the themes or subthemes at this stage.

Data were triangulated across staff focus groups and resident interviews for Objective 1, to identify perceptions about trial acceptability that were common to both sets of participants.

## Results

### Participants:

Twelve staff participants took part in six focus groups, one at each of the care home sites. All participants were women and all three arms of the trial were represented. The participants were all involved with the trial for the full 6-month intervention. The main reason for care home staff that had participated in the trial being unable to attend the focus groups was the busy care home schedule and staff shift patterns.

Four resident participants took part in the individual interviews. All participants were women and two arms of the trial were represented; the ONS arm and the SC arm. None of the residents approached by the dietitian researcher (RS) refused to participate in the interviews, or dropped out.

| <b>Table 2: Identified themes and subthemes from care home staff and residents regarding their experiences of the trial procedures:</b> |                                                    |
|-----------------------------------------------------------------------------------------------------------------------------------------|----------------------------------------------------|
| <b>CARE HOME STAFF</b>                                                                                                                  |                                                    |
| <b>Theme</b>                                                                                                                            | <b>Subthemes</b>                                   |
| <b>Perceived acceptability of involvement in the trial</b>                                                                              | Not viewed as additional work                      |
|                                                                                                                                         | Importance of all staff being made aware           |
| <b>Staff completion of nutritional screening</b>                                                                                        | Confident in the process                           |
|                                                                                                                                         | The value of 'MUST' training                       |
| <b>The challenge of undertaking physical measurements with care home residents</b>                                                      | Fluctuating mood and capacity                      |
|                                                                                                                                         | Potential for staff training                       |
| <b>The challenge of delivering a nutritional intervention protocol in a care home</b>                                                   |                                                    |
| <b>Resident completion of PROMs questionnaires</b>                                                                                      | Feasible for more residents to have completed them |
|                                                                                                                                         | Value of more residents completing them            |
| <b>RESIDENTS</b>                                                                                                                        |                                                    |
| <b>Theme</b>                                                                                                                            | <b>Subthemes</b>                                   |
| <b>Perceived acceptability of taking part in PROMs data collection</b>                                                                  |                                                    |
| <b>Completion of PROMs questionnaires</b>                                                                                               | Understanding of the tools                         |
|                                                                                                                                         | Value of residents completing them                 |
| <b>Perceived acceptability of the physical measurements</b>                                                                             |                                                    |
| <b>Perceived acceptability of the</b>                                                                                                   | Disagreement regarding acceptability               |

**nutritional intervention protocol**

No perceived impact of ONS on appetite

**Care home staff and residents perceptions of the acceptability of trial procedures:**

The themes and subthemes identified from the care home staff focus group data and resident interview data are shown in Table 2. Major themes that emerged from the data included: the perceived acceptability of being involved in the trial, the value of residents completing PROMs questionnaires and voicing their opinion, and the challenge of undertaking physical measurements and delivering an intervention protocol with some groups of residents. Supporting quotations from care home staff and residents regarding their experiences of being involved in the trial are presented in boxes 1 and 2, respectively.

**Care home staff perspectives of nutritional interventions and dietetic care in the treatment of malnutrition:**

The themes and subthemes identified from the care home staff focus group data are shown in Table 3. Major themes that emerged from the data included: the importance of considering resident preference and the potential for personalised plans, the perceived value of FB and ONS interventions by staff and families and the perceived value of dietetic input. Supporting quotations from care home staff regarding their perspectives of nutritional interventions and dietetic care in the treatment of malnutrition are illustrated in box 3.

**Table 3: Identified themes and subthemes from care home staff regarding their perspectives of nutritional interventions and dietetic care**

| Theme                                                          | Subthemes                                                       |
|----------------------------------------------------------------|-----------------------------------------------------------------|
| <b>The value of nutritional interventions for malnutrition</b> | Resident preference and personalisation                         |
|                                                                | Perceived improvements with FB and ONS interventions            |
|                                                                | Perceived value of interventions from the families of residents |
| <b>The value of dietetic-led intervention</b>                  |                                                                 |

**Discussion****Care home staff and residents perceptions of the acceptability of trial procedures**

1  
2  
3 This is the first study that examined the perceptions of the acceptability of trial procedures in  
4 the care home setting with staff and residents, a topic which has not previously been  
5 explored within the literature. Triangulation of data from the focus groups and semi-  
6 structured interviews highlighted some common themes for both those that reside in and  
7 those that work in the care homes. Both the staff and residents felt their involvement in the  
8 trial to be acceptable. It was not viewed as creating additional work for the staff, and the  
9 residents perceived it to take up little of their time. The use of PROMs to assess self-  
10 perceived quality of life and health state and as a means of enabling residents to voice their  
11 opinion of the food and nutritional interventions was viewed as positive and of value to the  
12 trial, with the tools and questionnaires perceived as acceptable for residents to complete.  
13 Both groups of participants felt that more of the residents that took part in the trial could have  
14 completed the PROMs. The restrictions imposed by the approving REC meant that those  
15 residents lacking capacity were excluded from the collection of this data on the basis that  
16 their involvement would not benefit other people with the same or similar impairing  
17 condition.[8,36] The perceived acceptability of the tools by staff and residents in this study  
18 supports the future assessment of feasibility and acceptability with a more representative  
19 care home population, giving scope to investigate the relationship between nutrition support  
20 and PROMs and to further explore resident experience of mealtimes and interventions, both  
21 areas that have been highlighted within the literature as requiring further research within this  
22 setting.[42-43]

23 Staff noted the value in finding out what the residents think through the use of  
24 PROMs, with one stating that 'sometimes this generation like to agree with everything'. Care  
25 home residents have been described previously within the literature as 'silent recipients of  
26 care',[44] tending not to highlight concerns or make clear their preferences, either due to  
27 cognitive impairment or because of the cultural norms of their generation.[45] The use of  
28 tools and questionnaires may provide residents with a non-verbal means of expressing their  
29 opinions of care and may assist in the effective delivery of person-centred health and social  
30 care, as advocated by the Care Quality Commission.[46]

31 Despite the perceived acceptability of involvement in the trial, the care home staff  
32 highlighted the challenges associated with taking physical measurements with residents and  
33 delivering a nutritional intervention protocol in this setting. These barriers included fluctuating  
34 mood and capacity of some residents, as well as reference to the high proportion of  
35 residents with a primary diagnosis of dementia (75%).[8] Other trials conducted in  
36 populations with fluctuating capacity have noted similar challenges when taking  
37 measurements such as Tricep Skinfold Thickness[47] and handgrip strength.[42,48] Whilst  
38 the residents interviewed felt that the physical measurements were acceptable and not  
39 deemed to be time consuming, one resident mentioned that daily mood and individual  
40 preferences can sometimes result in a lack of acceptance with an assessment schedule or  
41 an intervention.

42 A theme that emerged only from staff focus groups was the interest in care home  
43 staff receiving training to enable them to take anthropometric and functionality measures  
44 including Mid Upper Arm Circumference, Tricep Skinfold Thickness and Handgrip strength.  
45 Some felt that this might have been useful within the trial, as a means of enabling  
46 measurements to be taken when residents were in a better mood, or having a good day.  
47 Others felt that it would be helpful for staff to be upskilled in this way outside of the trial  
48 setting, to support in their assessment of nutritional status. The emergence of this theme  
49 may be related to the perceived value placed on nutritional screening ('MUST') training by  
50 the staff, and their subsequent self-perceived confidence and competence in completing  
51 resident screening as part of usual care. Improvements in 'MUST' documentation and  
52 accuracy following dietetic-led projects are supported within the literature.[49-50] The  
53 interest from staff to expand their skill base could provide scope to introduce more  
54 comprehensive staff-led assessments of nutritional status within the care home setting.  
55 There are however, challenges associated with taking these measurements, including  
56 measurement error due to poor technique and substantial differences when measurements  
57 are made on the same individual by different observers.[51] If such an approach were to be  
58  
59  
60

1  
2  
3 implemented in practice, it would require a standardised protocol and regular training  
4 updates.  
5

### 6 **Care home staff perspectives of nutritional interventions and dietetic care in** 7 **the treatment of malnutrition** 8

9 A major theme which emerged from the focus group data was the perceived value placed by  
10 staff on the nutritional interventions, both food-based (FB) and oral nutritional supplements  
11 (ONS), when compared to the standard nutritional care provided by the homes. A common  
12 perception amongst the staff was that they would expect the introduction of either  
13 intervention to be associated with improved outcomes, particularly weight. They also noted  
14 that the families of residents involved in the trial viewed the interventions as valuable and  
15 wished the residents to continue beyond the assigned protocol. Good staff knowledge of the  
16 nutritional interventions available to address malnutrition, and a positive attitude towards  
17 these interventions has been shown previously in the literature,[52-53] demonstrating that  
18 this is perhaps an aspect of nutritional care that is familiar to care home staff and is therefore  
19 perceived to be of value.

20 Another theme which emerged from the focus groups was the perceived value of  
21 dietetic input, with some staff expressing the opinion that residents requiring nutrition support  
22 'would do better with dietetic intervention' and others mentioning that it was of benefit to  
23 have the dietitian visit the home more often. Previous research focusing on the knowledge of  
24 care home staff has highlighted the greatest knowledge deficits to be associated with  
25 nutrient and food requirements in older adults,[52,54] which perhaps explains the value  
26 placed on dietetic expertise by care home staff in this study. As the nutritional interventions  
27 used in this trial were delivered by the dietitian, an interesting area for future research, might  
28 be to explore the care home staff perceptions of the nutritional interventions (FB or ONS)  
29 when delivered without dietetic input.

30 A prominent sub-theme that emerged in relation to the nutritional interventions was  
31 the importance placed by staff on resident preferences and the scope to provide a  
32 personalised plan. This sub-theme illustrates a commonality with the feedback provided by  
33 residents when discussing the acceptability of the interventions, with some expressing a  
34 preference for certain types of oral nutritional supplements and others stating that they would  
35 have preferred a homemade drink. The importance of involving residents in decisions about  
36 their care, including nutrition and mealtimes has been highlighted by the British Geriatrics  
37 Society (2011)[55] and has been shown to be positively associated with quality of life.[56] A  
38 recent study by Watkins et al (2017),[57] which used semi-structured interviews to explore  
39 resident's experiences of mealtime's concluded that freedom of choice is a key component  
40 of their experiences of care. Whilst it may not always be possible for residents to make  
41 decisions on all aspects of their care, it is apparent from this study that resident preferences  
42 should be considered alongside clinical reasoning when implementing a nutrition support  
43 plan. The individualisation of an intervention to suit a client's needs is a core component of  
44 the shared decision making underpinning dietetic practice as outlined within the British  
45 Dietetic Association's 'Model and Process for Nutrition and Dietetic Practice'.[58] This study  
46 highlights the importance of this approach within the care home setting.  
47  
48  
49  
50  
51

### 52 **Strengths and limitations** 53

54 A key strength of this study is that it is the first to inform understanding of the feasibility and  
55 acceptability of conducting a clinical trial evaluating nutritional interventions in the care home  
56 setting, by exploring the opinions and perspectives of the staff and the residents involved in  
57  
58  
59

1  
2  
3 the trial. The inclusion of care home residents, highlighted as an underrepresented group  
4 within the research literature[12] has added to our understanding of their experiences of  
5 being involved with research and of nutritional care within this setting. Use of individual  
6 interviews allowed for the discussion of personal feelings with residents and gave each the  
7 chance to freely voice their views. The dynamic interaction of the staff focus groups were  
8 perceived by the researcher as open and positive, and provided insight into shared  
9 viewpoints within and between care home sites.

10 A limitation of this study is the small sample size, particularly with regards the  
11 number of residents interviewed. The views held by this small sample of residents, who were  
12 all female and had capacity, may not be representative of the other residents that took part  
13 in the trial. There was a lack of representation from residents in the FB intervention arm, but  
14 a staff focus group was conducted at each care home site, therefore providing  
15 representativeness from staff in each arm of the trial, and capturing the views of both nursing  
16 and care staff. It is possible that the care homes recruited into this study do not necessarily  
17 represent the national care home population. All sites had been in receipt of long-term and  
18 regular input from the local dietetic service and were engaged in a programme of staff  
19 training. The dietitian researcher (RS) had an established relationship with the managers  
20 and staff at the homes, which may have made it easier to recruit to and facilitate the staff  
21 focus groups. Exploration of staff experiences of feasibility and acceptability was carried out  
22 in engaged and motivated care homes, which may limit transferability. However, the focus  
23 groups and interviews have informed our understanding of the experiences of trial  
24 involvement and the perceived acceptability and value of nutritional interventions from the  
25 perspectives of both care home staff and residents.

## 26 27 Conclusions

28  
29 From staff focus groups and interviews with residents, involvement in a clinical trial  
30 evaluating nutritional interventions for malnutrition in the care home setting was perceived as  
31 acceptable, although the challenges associated with research in this setting were  
32 acknowledged. Both staff and residents agreed that the use of PROMs within the trial was  
33 positive and valuable and that more residents could have completed them. Care home staff  
34 demonstrated a positive attitude towards both the nutritional interventions used in the trial,  
35 and the value added by dietetic input. Resident preferences were identified as important,  
36 because they are likely to affect compliance with an intervention. To ensure that these are  
37 accounted for, it is suggested that a nutrition support plan be developed collaboratively  
38 between the dietitian and the staff, the resident and their relatives, to meet both the clinical  
39 needs and the preferences of the individual.  
40  
41  
42  
43  
44  
45  
46  
47  
48  
49

### 50 **Box 1: Direct quotations supporting themes and subthemes from care home** 51 **staff regarding their experiences of the trial procedures (Using CH1 to CH6 to** 52 **indicate the care home source):**

#### 53 54 **Perceived acceptability of involvement in the trial:**

55 Care home staff did not perceive involvement in the trial to be any additional work, with a lot  
56 of the required information already being collected in care plans:  
57  
58  
59  
60

1  
2  
3 'No different to usual at all' (CH1)  
4 'No additional work (collecting healthcare resource usage data)- all in the notes' (CH1)  
5 'I can't say that it was a hassle, we just treated it as we should do anyway'(CH2)  
6 'All the required information is documented in care plans anyway- not extra information' (CH2)  
7 'No, wasn't really any different....it's (SC) what we are doing anyway' (CH3)  
8 'Carers would be fortifying anyway, and working with the kitchen' (CH4)  
9 "I was happy that you chose us to be involved- it wasn't any extra work' (CH6)  
10 'It didn't seem like extra work- it was very organised' (CH1)

11  
12 **Some care home staff stressed the importance of all staff in the home being made**  
13 **aware of the trial and what was required of them:**

14 'We had a list in the kitchen to make it easy for staff to deliver the intervention' (CH2)  
15 'We put extra copies of the sheets (personalised dietetic FB plans) in the residents rooms to  
16 make sure the carers understood and knew what it was all about' (CH4)  
17 'Everyone had a list of the residents that needed the FB intervention, they also had all the  
18 recipes to follow, so it was not challenging' (CH6)  
19 'It was straightforward so long as staff knew to sign that they (ONS) had been given' (CH1)

20  
21 **Staff completion of nutritional screening:**

22 **The care home staff expressed a confidence in undertaking the 'MUST' nutritional**  
23 **screening:**

24 'Very confident in completing' (CH1)  
25 'We do the MUST (the seniors)- no problem with completing it' (CH2)  
26 'Staff are confident in doing this and knowing what to do next' (CH3)  
27 'I think we have gained more confidence in using MUST' (CH6)

28  
29 **Staff discussed the value of training to support them with this:**

30 'I found it hard to begin with, but it's alright now we've had lots of training' (CH2)  
31 'We have a good knowledge now we've been trained' (CH5)  
32 'Further training on completing MUST is always useful' (CH4)  
33 'The only challenge is we don't always have heights, but now I know how to take the arm  
34 measurement (ulna length) if I can't get height' (CH5)

35  
36 **The challenge of undertaking physical measurements with care home residents:**

37 **The care home staff spoke about how the fluctuating mood and capacity of residents**  
38 **can make it difficult to undertake physical measurements, especially if restricted to a**  
39 **particular day and time**

40 'The patients were not refusing you because it was a study, they refuse to do things for us as  
41 well' (CH1)  
42 'It's dementia and it's really hard- it depends on the day' (CH2)  
43 'It's a challenge of the care home setting' (CH3)  
44 'It's just a challenge of care homes- If they refuse, they refuse' (CH4)  
45 'it depends on the individual, not all of them will be weighed either' (CH5)  
46 'Challenging in a care home- with people that have dementia, it depends on the day' (CH6)  
47 'They behave differently at different times of the day' (CH6)  
48 'Limitation of time- you are committed to come on that day- if the residents are having a bad  
49 day, you won't be able to get the measurements properly' (CH6)

50  
51 **They expressed an interest in receiving training on how to undertake some of these**  
52 **physical measurements, to improve their skill base**

53 'Would be good if staff could be shown how to do these other measurements' (CH2)  
54 'It might work better if staff could be trained to do these measurements' (CH4)  
55 'If they can't do the weight, it would be good for staff to have more skills' (CH5)

**The challenge of delivering a nutritional intervention protocol in a care home:**

**The care home staff cited challenges including physical space for supplements, additional work for kitchen staff, and encouraging the residents to take the interventions**

'It's quite hard to get the residents (with dementia) to have things every day, whatever it is' (CH2)

'There are a couple of residents that won't comply whatever the intervention' (CH4)

'Only negative we had was all the supplements arriving at the same time- we don't have that much space!' (CH1)

'There was more for the kitchen staff to do, but they didn't see it as extra work' (CH6)

**Resident completion of PROMs questionnaires**

**The care home staff indicated that they felt more residents would have been able to complete the PROM's questionnaires used within the trial**

'Some (residents without capacity) would be able to take part, but it depends on the day- are they having a good day?' (CH1)

'More of them could have completed them' (CH2)

'We have a couple on here that could have been able to answer these' (CH3)

'I like these (COOP QoL tool) , I've never seen these before- more residents could have completed them' (CH4)

'Not all of them, but yes 2 or 3 could have done' (CH5)

'Yes, they would have been able to complete these or tell you' (CH6)

**They felt that there would have been value to more of the residents getting to have their say**

'It would be nice for them to be able to give their thoughts' (CH2)

'Would be useful to know what they think...sometimes this generation like to just agree with everything' (CH3)

'I think it is important for more of the residents to have a say' (CH6)

**Box 2: Direct quotations supporting themes and subthemes from residents regarding their experiences of the trial procedures (Using R1 to R4 to indicate the source of the quotation):**

**Perceived acceptability of taking part in PROMs data collection:**

**The residents perceived their involvement to be acceptable and did not feel that it took up much time**

'Didn't take up much time, it was alright' (R1)

'It was alright- not too much of a burden' (R2)

'It was okay' (R3)

'Don't think it's taken up much time' (R4)

**Feasibility of completing PROMs questionnaires:**

**The residents indicated that the tools were easy to understand and that what was being asked made sense:**

'Understood, was not complicated' (R1)

'Fine as it was, no need to change them' (R1)

'Yes, understood what you were asking me' (R2)

'Yes, easy to understand' (R3)

'They made sense' (R4)

**They felt that there was value to completing these tools and that more residents might also have been able to voice their opinion:**



1  
2  
3 'Good to have a say, would be good if more residents could have done them' (R1)  
4 'It's nice to give an opinion if I can. Some of the other residents could have done them too'  
5 (R3)  
6 'It's very important to be asked about the food and your appetite' (R4)  
7 'Could have asked other residents the questions' (R2)  
8

9 **Perceived acceptability of the physical measurements**

10 **The residents felt that the physical measurements were acceptable, although one**  
11 **resident mentioned that mood might have an impact**

12 'It was ok, not a hassle' (R1)  
13 'It was fine to take the measures in the bedrooms' (R1)  
14 'No trouble, but probably depends what mood I'm in!' (R2)  
15 'Yes, it was okay to do' (R3)  
16 'It (handgrip) was quite fun' (R3)  
17 'Yes, it was alright- it didn't hurt' (R4)  
18

19 **Perceived acceptability of the nutritional intervention**

20 **Some residents felt that the nutritional interventions were acceptable, and provided**  
21 **positive feedback**

22 'I Liked those' (ONS) (R1)  
23 'I liked the flavour and it was good that they were quite small' (compact supplements) (R1)  
24 'Quite liked them (ONS) when I did have them' (R3)  
25 'Yes it is acceptable (SC), I have extra glasses of milk' (R4)  
26

27 **But one resident indicated that the intervention was not always well tolerated**

28 'I had one (ONS) a day, if I have two, they upset my stomach' (R2)  
29 'I think I prefer the homemade ones' (R2)  
30

31 **The residents in the ONS arm, felt that the supplements did not impact upon their**  
32 **appetite for other meals**

33 'No, they were good for my appetite' (R3)  
34 'No they didn't reduce my appetite' (R2)  
35 'No effect on my appetite for meals' (R1)  
36

37  
38  
39 **Box 3: Direct quotations supporting themes and subthemes from care home**  
40 **staff regarding their perspectives of nutritional interventions and dietetic care**  
41 **in the treatment of malnutrition (Using CH1 to CH6 to indicate the care home**  
42 **source):**  
43

44 **The value of nutritional interventions for malnutrition:**

45 **The care home staff highlighted the importance of patient/resident preference and**  
46 **where possible, being able to provide a personalised plan**

47 'We had one person who didn't like them (ONS), she just did not like the taste' (CH1)  
48 'The majority of the residents liked them (ONS), there was one lady who just completely  
49 would not have it' (CH2)  
50 'Would they do as well with snacks as drinks? I've been thinking about that- as they don't  
51 always take the snacks- it would depend on what the person preferred' (CH2)  
52 'I think the extra homemade things is better, not everyone will drink the supplements' (CH6)  
53 'Would be a good idea if the kitchen made their own milky drinks- could be a bit more flexible  
54 with that' (CH2)  
55 'Personalised plans are better aren't they' (CH4)  
56  
57  
58  
59  
60

1  
2  
3 'Glass of milk, with cream and chocolate powder as a smoothie- they enjoy it' (CH6)  
4

5 **Some of the care home staff mentioned that the interventions were perceived as**  
6 **valuable by the residents families, with some, wanting them to continue beyond the**  
7 **trial:**

8 'A lot of the families have asked if residents could continue supplements' (CH1)

9 'Most of the residents accepted it (the FB intervention) as part of their diet plan- they were  
10 pleased to have something extra and the families were as well' (CH6)

11  
12 **The care home staff communicated the belief that the FB and ONS interventions would**  
13 **bring about improvements in outcomes such as weight, wellbeing and mental health:**

14 'Improvement in resident's wellbeing, including mental wellbeing' (ONS) (CH1)

15 'Yes, expected weight to increase- usual food regime plus supplements' (CH1)

16 'Yes, would expect the weight to increase' (ONS) (CH2)

17 'I don't think they needed anything additional to FB intervention' (CH4)

18 'Yes, I would like to think there would be an increase in weight with FB intervention' (CH4)

19 'I think they would have benefitted by being in one of the other groups- FB or ONS' (CH5)

20 'Some of the residents behaviour improved while they were in the trial' (ONS) (CH1)

21 'I feel it was acceptable for the residents.....a lot of them want to continue' (ONS) (CH1)  
22

23 **The value of dietetic-led intervention:**

24 **The care home staff highlighted the usefulness of dietetic visits and discussion:**

25 'It's useful to be told specific things to do by the dietitian- extra things to add into the diet that  
26 you might not have thought of' (CH3)

27 'We could have tried different things on discussion with you (dietitian)' (CH5)

28 'Would think they would do better with dietetic intervention' (CH5)

29 'It was a benefit to have the dietitian here more often' (CH6)  
30

31  
32  
33  
34  
35  
36  
37  
38  
39  
40  
41  
42  
43  
44  
45  
46  
47  
48 **References:**  
49

- 50  
51 1. LaingBuisson. Care of Older People: UK Market Report, 27th edition. 2015  
52 [http://www.laingbuisson.co.uk/Portals/1/MarketReports/Documents/Care\\_OlderPeople\\_27ed\\_Bro\\_WEB.pdf?ver=2015-09-29-162653-327](http://www.laingbuisson.co.uk/Portals/1/MarketReports/Documents/Care_OlderPeople_27ed_Bro_WEB.pdf?ver=2015-09-29-162653-327) (Accessed 04 February 2018).  
53  
54 2. Nimmo AW, Peterkin G, Coid DR. Mortality in general practice: Problems concerning  
55 deaths in institutions. *Public Health* 2006;126:671.  
56 3. Sinclair AJ, Gadsby R, Penfold A, et al. Prevalence of diabetes in care home residents.  
57 *Diabetes Care* 2001;24:1066-8.  
58

- 1
- 2
- 3
- 4 4. Bayer A, Todd W. Unjustified exclusion of elderly people from studies submitted to  
5 research ethics committee for approval: descriptive study. *Br Med J*  
6 2000;321(7267):992-993.
- 7 5. Elia M. The cost of malnutrition in England and potential cost savings from nutritional  
8 interventions. Malnutrition Action Group of BAPEN and the National Institute for Health  
9 Research Southampton Biomedical Research Centre. 2015  
10 <http://www.bapen.org.uk/pdfs/economic-report-full.pdf> (Accessed 04 February 2018)
- 11 6. Russell CA, Elia M. Nutrition Screening Survey in the UK and Republic of Ireland.  
12 BAPEN. 2010 <http://www.bapen.org.uk/pdfs/nsw/nsw10/nsw10-report.pdf> (Accessed 01  
13 December, 2017).
- 14 7. Parsons EL, Elia M, Cawood AL. Randomised controlled trials shows greater total  
15 nutritional intakes with liquid supplements than dietary advice in care home residents.  
16 *Clin Nutr Supp* 2011;6(1):1.
- 17 8. Stow R, Ives N, Smith C, Rick C, Rushton A. A cluster randomised feasibility trial  
18 evaluating nutritional interventions in the treatment of malnutrition in care home adult  
19 residents. *Trials* 2015;16:433.
- 20 9. Arvanitakis M, Coppens P, Doughan L, Van Gossum A. Nutrition in care homes and  
21 home care: Recommendations- a summary based on the report approved by the Council  
22 of Europe. *Clin Nutr* 2009;28:492–6.
- 23 10. Meijers J, Halfens RJ, Wilson L, Schols JM. Estimating the costs associated with  
24 malnutrition in Dutch nursing homes. *Clin Nutr* 2012;31:65–8.
- 25 11. Watts G. Why the exclusion of older people from clinical research must stop. *Br Med J*  
26 2012;344:e3445
- 27 12. Maas M, Kelley L, Park M, Specht JP. Issues in conducting research in nursing homes.  
28 *West J Nurs Res* 2002;4:373–89.
- 29 13. Hall S, Longhurst S, Higginson IJ. Challenges to conducting research with older people  
30 living in nursing homes. *BMC Geriatr* 2009;9:38.
- 31 14. Ridda I, Lindley R, Macintyre R. The challenges of clinical trials in the exclusion zone:  
32 the case of the frail elderly. *Australas J Ageing* 2008;27(2):61-66.
- 33 15. Fiatarone Singh MA, Bernstein MA, Ryan AD, et al. The effect of oral nutritional  
34 supplements on habitual dietary quality and quantity in frail elders. *J Nutr Health Aging*  
35 2000;4:5–12.
- 36 16. Smoliner C, Norman K, Scheufele R, et al. Effects of food fortification on nutritional and  
37 functional status in frail elderly nursing home residents at risk of malnutrition. *Nutrition*  
38 2008;24:1139–44.
- 39 17. Manders M, de Groot CP, Blauw YH, et al. Effect of a nutrient-enriched drink on dietary  
40 intake and nutritional status in institutionalized elderly. *Eur J Clin Nut* 2009;63:1241–50.
- 41 18. Lee LC, Tsai AC, Wang JY. Need-based intervention is an effective strategy for  
42 improving the nutritional status of older people living in a nursing home: A randomized  
43 controlled trial. *Int J Nurs Stud* 2013;50:1580–8.
- 44 19. O’Cathain A, Murphy E, Nicholl J. Why, and how, mixed methods research is undertaken  
45 in health services research in England: a mixed methods study. *BMC Health Serv Res*  
46 2007;7:85
- 47 20. Mackey S. Phenomenological nursing research: methodological insights derived from  
48 Heidegger’s interpretive phenomenology. *Int J Nurs Stud* 2005;42:179–86.
- 49 21. Munhall PL. Nursing research. Sudbury, MA: Jones & Bartlett Learning 2012.
- 50 22. Tong A, Sainsbury P, Craig J. Consolidated criteria for reporting qualitative research  
51 (COREQ): a 32-item checklist for interviews and focus groups. *Int J Qual Health Care*  
52 2007;19:349–57.
- 53 23. Ritchie J, Lewis J. Qualitative research practice: a guide for social science student and  
54 researchers. London: Sage 2003.
- 55 24. Chilban J. Interviewing in depth: the interactive-relational approach. Thousand Oaks CA:  
56 Sage 1996.
- 57 25. Johnson J. In-depth interviewing. In Gubrium J, Holstein J, eds. Handbook of Qualitative  
58 Research. Thousand Oaks, CA: Sage 2002:19-103.

- 1
- 2
- 3 26. Rubin H, Rubin J. *Qualitative Interviewing: The Art of Hearing Data*. Thousand Oaks CA: Sage Publications 2005
- 4
- 5 27. Bryman A. *Social Research Methods*. Oxford: Oxford University Press 2004.
- 6 28. Rabiee F. Focus-Group interview and data analysis. *Proc Nutr Soc* 2004;63:655-660.
- 7 29. Kitzinger J. Qualitative Research: Introducing focus groups. *Br Med J* 1995;311:299-302.
- 8
- 9 30. Hudson P, Aranda S, McMurray N. Intervention development for enhanced lay palliative caregiver support. *Eur J Cancer Care* 2002;11:262-270.
- 10 31. Lane P, McKenna H, Ryan A, et al. Focus group methodology. *Nurse Res* 2001;8(3):45-59
- 11 32. Kreuger A, Casey M. *Focus groups: a practical guide for applied research*. London: Sage Publications 2000
- 12 33. Richardson CA, Rabiee F. 'A Question of Access' – an exploration of the factors influencing the health of young males aged 15–19 living in Corby and their use of health care services. *Health Educ J* 2001;60:3–6.
- 13 34. National Institute for Health and Clinical Excellence. CG32 Nutrition Support in Adults: oral nutrition support, enteral tube feeding and parenteral nutrition. 2006 <http://guidance.nice.org.uk/CG32/niceguidance/pdf/English> (Accessed 05 December 2017).
- 14 35. Malnutrition pathway. *Managing Adult Malnutrition in the Community*. 2012 <http://www.malnutritionpathway.co.uk> (Accessed 01 April 2013).
- 15 36. Department of Health. *Mental Capacity Act 2005*. 2005 [http://www.dh.gov.uk/en/Publicationsandstatistics/Publications/PublicationsPolicyAndGuidance/DH\\_4137745](http://www.dh.gov.uk/en/Publicationsandstatistics/Publications/PublicationsPolicyAndGuidance/DH_4137745) (Accessed 07 November 2017).
- 16 37. Krueger RA. *Focus Groups: A practical guide for applied research*. Thousand Oaks, CA: Sage Publications 1994.
- 17 38. Ritchie J, Spencer L. Qualitative data analysis for applied policy research. In Bryman A, Burgess RG, eds. *Analysing Qualitative Data*. London: Routledge 1994.
- 18 39. Braun V, Clarke, V. Using thematic analysis in psychology. *Qual Res Psychol* 2006;3:77-101.
- 19 40. King N. Using templates in the thematic analysis of text. In Cassell C, Symon G, eds. *Essential guide to qualitative methods in organisational research*. London, UK: Sage 2004:257-270.
- 20 41. Ezzy D. *Qualitative Analysis Practice and Innovation*. London: Routledge 2002
- 21 42. Stange I, Bartramb M, Liao YB, et al. Effects of a Low-Volume, Nutrient- and Energy-Dense Oral Nutritional Supplement on Nutritional and Functional Status: A Randomized, Controlled Trial in Nursing Home Residents. *JAMDA* 2012;14:628.e1-8.
- 22 43. Watkins R, Goodwin VA, Abbott RA, et al. Attitudes, perceptions and experiences of mealtimes among residents and staff in care homes for older adults: A systematic review of the qualitative literature. *Geriatr Nurs*. 2017;38(4):325-333
- 23 44. Reimer HD, Keller HH. Mealtimes in Nursing Homes: Striving for Person-Centred Care. *J Nutr Elder* 2009;28(4):22.
- 24 45. Sidenvall B. Meal procedures in institutions for elderly people: a theoretical interpretation. *J Adv Nurs* 1999;30(2):319–28.
- 25 46. Care Quality Commission. *The State of Health Care and Adult Social Care in England: Key themes and quality of services in 2009*. The Stationery Office. 2010 [https://www.gov.uk/government/uploads/system/uploads/attachment\\_data/file/229162/0343.pdf](https://www.gov.uk/government/uploads/system/uploads/attachment_data/file/229162/0343.pdf) (Accessed 08 December 2017).
- 26 47. Waninge A, van der Weide W, Evenhuis IJ, et al. Feasibility and reliability of body composition measurements in adults with severe intellectual and sensory disabilities. *J Intellect Disabil Res* 2009;53(4):377-388.
- 27 48. Hoppitt T, Sackley C, Wright C. Finding the right outcome measures for care home research. *Age Ageing* 2010;39:119–22.
- 28 49. Cawood AL, Smith A, Dalrymple-Smith JR, et al. Prevalence of malnutrition and use of nutritional support in Peterborough Primary Care Trust. *J Hum Nutr Diet* 2008;21(4):384
- 29
- 30
- 31
- 32
- 33
- 34
- 35
- 36
- 37
- 38
- 39
- 40
- 41
- 42
- 43
- 44
- 45
- 46
- 47
- 48
- 49
- 50
- 51
- 52
- 53
- 54
- 55
- 56
- 57
- 58
- 59
- 60

- 1  
2  
3 50. Woodcock CL, Jukes K, Davies S. Tailored training on screening for malnutrition using  
4 the 'Malnutrition Universal Screening Tool' ('MUST') and management plans improves  
5 screening accuracy and documentation in care homes in West Sussex. *Proc Nutr Soc*  
6 2001;70(OCE5): E257.
- 7 51. Ulijaszek SJ, Kerr DA. Anthropometric measurement error and the assessment of  
8 nutritional status. *Br J Nutr* 1999;82:165–77.
- 9 52. Beattie E, O'Reilly M, Strange E, et al. How much do residential aged care staff  
10 members know about the nutritional needs of residents? *Int J Older People Nurs*  
11 2013;9(4):54-64
- 12 53. Bauer S, Halfens RJG, Lohrmann CJ. Knowledge and attitudes of nursing staff towards  
13 malnutrition care in nursing homes: A multicentre cross-sectional study. *Nutr Health*  
14 *Aging* 2015;19:734.
- 15 54. Crogan NL, Shultz JA, Massey LK. Nutrition knowledge of nurses in long-term care  
16 facilities. *J Contin Educ Nurs* 2001;32:171–176.
- 17 55. British Geriatrics Society. Quest for Quality. 2011  
18 [http://www.bgs.org.uk/campaigns/carehomes/quest\\_quality\\_care\\_homes.pdf](http://www.bgs.org.uk/campaigns/carehomes/quest_quality_care_homes.pdf) (Accessed  
19 07 November 2017).
- 20 56. Philpin S, Merrell J, Warring J, et al. Memories, identity and homeliness: The social  
21 construction of mealtimes in residential care homes in South Wales. *Ageing Soc*  
22 2014;34(5):753–89.
- 23 57. Watkins R, Goodwin V, Abbott R, et al. Exploring residents' experiences of mealtimes in  
24 care homes: A qualitative interview study. *BMC Geriatrics* 2017;17:141.
- 25 58. British Dietetic Association. Model and Process for Nutrition and Dietetic Practice.  
26 Birmingham: BDA 2016.
- 27  
28  
29  
30  
31  
32  
33  
34  
35  
36  
37  
38  
39  
40  
41  
42  
43  
44  
45  
46  
47  
48  
49  
50  
51  
52  
53  
54  
55  
56  
57  
58  
59  
60

## COREQ (COnsolidated criteria for REporting Qualitative research) Checklist

A checklist of items that should be included in reports of qualitative research. You must report the page number in your manuscript where you consider each of the items listed in this checklist. If you have not included this information, either revise your manuscript accordingly before submitting or note N/A.

| Topic                                          | Item No. | Guide Questions/Description                                                                                                                              | Reported on Page No. |
|------------------------------------------------|----------|----------------------------------------------------------------------------------------------------------------------------------------------------------|----------------------|
| <b>Domain 1: Research team and reflexivity</b> |          |                                                                                                                                                          |                      |
| <i>Personal characteristics</i>                |          |                                                                                                                                                          |                      |
| Interviewer/facilitator                        | 1        | Which author/s conducted the interview or focus group?                                                                                                   |                      |
| Credentials                                    | 2        | What were the researcher's credentials? E.g. PhD, MD                                                                                                     |                      |
| Occupation                                     | 3        | What was their occupation at the time of the study?                                                                                                      |                      |
| Gender                                         | 4        | Was the researcher male or female?                                                                                                                       |                      |
| Experience and training                        | 5        | What experience or training did the researcher have?                                                                                                     |                      |
| <i>Relationship with participants</i>          |          |                                                                                                                                                          |                      |
| Relationship established                       | 6        | Was a relationship established prior to study commencement?                                                                                              |                      |
| Participant knowledge of the interviewer       | 7        | What did the participants know about the researcher? e.g. personal goals, reasons for doing the research                                                 |                      |
| Interviewer characteristics                    | 8        | What characteristics were reported about the interviewer/facilitator? e.g. Bias, assumptions, reasons and interests in the research topic                |                      |
| <b>Domain 2: Study design</b>                  |          |                                                                                                                                                          |                      |
| <i>Theoretical framework</i>                   |          |                                                                                                                                                          |                      |
| Methodological orientation and Theory          | 9        | What methodological orientation was stated to underpin the study? e.g. grounded theory, discourse analysis, ethnography, phenomenology, content analysis |                      |
| <i>Participant selection</i>                   |          |                                                                                                                                                          |                      |
| Sampling                                       | 10       | How were participants selected? e.g. purposive, convenience, consecutive, snowball                                                                       |                      |
| Method of approach                             | 11       | How were participants approached? e.g. face-to-face, telephone, mail, email                                                                              |                      |
| Sample size                                    | 12       | How many participants were in the study?                                                                                                                 |                      |
| Non-participation                              | 13       | How many people refused to participate or dropped out? Reasons?                                                                                          |                      |
| <i>Setting</i>                                 |          |                                                                                                                                                          |                      |
| Setting of data collection                     | 14       | Where was the data collected? e.g. home, clinic, workplace                                                                                               |                      |
| Presence of non-participants                   | 15       | Was anyone else present besides the participants and researchers?                                                                                        |                      |
| Description of sample                          | 16       | What are the important characteristics of the sample? e.g. demographic data, date                                                                        |                      |
| <i>Data collection</i>                         |          |                                                                                                                                                          |                      |
| Interview guide                                | 17       | Were questions, prompts, guides provided by the authors? Was it pilot tested?                                                                            |                      |
| Repeat interviews                              | 18       | Were repeat interviews carried out? If yes, how many?                                                                                                    |                      |
| Audio/visual recording                         | 19       | Did the research use audio or visual recording to collect the data?                                                                                      |                      |
| Field notes                                    | 20       | Were field notes made during and/or after the interview or focus group?                                                                                  |                      |
| Duration                                       | 21       | What was the duration of the interviews or focus group?                                                                                                  |                      |
| Data saturation                                | 22       | Was data saturation discussed?                                                                                                                           |                      |
| Transcripts returned                           | 23       | Were transcripts returned to participants for comment and/or                                                                                             |                      |

| Topic                                  | Item No. | Guide Questions/Description                                                                                                        | Reported on Page No. |
|----------------------------------------|----------|------------------------------------------------------------------------------------------------------------------------------------|----------------------|
|                                        |          | correction?                                                                                                                        |                      |
| <b>Domain 3: analysis and findings</b> |          |                                                                                                                                    |                      |
| <i>Data analysis</i>                   |          |                                                                                                                                    |                      |
| Number of data coders                  | 24       | How many data coders coded the data?                                                                                               |                      |
| Description of the coding tree         | 25       | Did authors provide a description of the coding tree?                                                                              |                      |
| Derivation of themes                   | 26       | Were themes identified in advance or derived from the data?                                                                        |                      |
| Software                               | 27       | What software, if applicable, was used to manage the data?                                                                         |                      |
| Participant checking                   | 28       | Did participants provide feedback on the findings?                                                                                 |                      |
| <i>Reporting</i>                       |          |                                                                                                                                    |                      |
| Quotations presented                   | 29       | Were participant quotations presented to illustrate the themes/findings?<br>Was each quotation identified? e.g. participant number |                      |
| Data and findings consistent           | 30       | Was there consistency between the data presented and the findings?                                                                 |                      |
| Clarity of major themes                | 31       | Were major themes clearly presented in the findings?                                                                               |                      |
| Clarity of minor themes                | 32       | Is there a description of diverse cases or discussion of minor themes?                                                             |                      |

Developed from: Tong A, Sainsbury P, Craig J. Consolidated criteria for reporting qualitative research (COREQ): a 32-item checklist for interviews and focus groups. *International Journal for Quality in Health Care*. 2007. Volume 19, Number 6: pp. 349 – 357

**Once you have completed this checklist, please save a copy and upload it as part of your submission. DO NOT include this checklist as part of the main manuscript document. It must be uploaded as a separate file.**

# BMJ Open

## Care home resident and staff perceptions of the acceptability of nutrition intervention trial procedures: a qualitative study embedded within a cluster randomised feasibility trial

|                                 |                                                                                                                                                                                                                                                                                              |
|---------------------------------|----------------------------------------------------------------------------------------------------------------------------------------------------------------------------------------------------------------------------------------------------------------------------------------------|
| Journal:                        | <i>BMJ Open</i>                                                                                                                                                                                                                                                                              |
| Manuscript ID                   | bmjopen-2018-022307.R1                                                                                                                                                                                                                                                                       |
| Article Type:                   | Research                                                                                                                                                                                                                                                                                     |
| Date Submitted by the Author:   | 16-May-2018                                                                                                                                                                                                                                                                                  |
| Complete List of Authors:       | Stow, Ruth; Birmingham City University, School of Health Sciences<br>Smith, Christina; University College London, 2. Language and Cognition, Division of Psychology and Language Sciences,<br>Rushton, Alison; University of Birmingham School of Sport Exercise and Rehabilitation Sciences |
| <b>Primary Subject Heading</b>: | Nutrition and metabolism                                                                                                                                                                                                                                                                     |
| Secondary Subject Heading:      | Geriatric medicine, Nutrition and metabolism, Patient-centred medicine                                                                                                                                                                                                                       |
| Keywords:                       | Malnutrition, Care homes, Older adults, GERIATRIC MEDICINE, Focus groups, NUTRITION & DIETETICS                                                                                                                                                                                              |
|                                 |                                                                                                                                                                                                                                                                                              |

SCHOLARONE™  
Manuscripts

Only



# Care home resident and staff perceptions of the acceptability of nutrition intervention trial procedures: a qualitative study embedded within a cluster randomised feasibility trial

Ruth Stow<sup>1</sup>, Christina H Smith<sup>2</sup>, Alison Rushton<sup>3</sup>

## Author Affiliations

1. School of Health Sciences, Birmingham City University, Birmingham, UK
2. Language and Cognition, Division of Psychology and Language Sciences, University College London, London, UK
3. Centre of Precision Rehabilitation for Spinal Pain, School of Sport, Exercise and Rehabilitation Sciences, University of Birmingham, Birmingham, UK

Correspondence to:

Ruth Stow: [ruth.stow@bcu.ac.uk](mailto:ruth.stow@bcu.ac.uk)

## Abstract

**Objectives** To examine care home resident and staff perceptions of the acceptability of participating in a feasibility trial evaluating nutritional interventions in the treatment of malnutrition.

**Design** Exploratory qualitative methodology was used to gather descriptions of resident and staff perceptions of trial procedures, using semi-structured interviews with residents and focus groups with staff. The interviews were used to explore individual perceptions of the acceptability of the assigned intervention and the outcomes measured. Focus groups were used to explore staff experiences of trial participation and perspectives of nutritional support interventions.

**Setting** The study was embedded within a cluster randomised feasibility trial, which randomised six care homes to provide standard care (SC), food-based intervention (FB), or oral nutritional supplement intervention (ONS) to residents with, or at risk of, malnutrition.

**Participants** Residents in the trial with capacity to consent (n=7) formed the sampling frame for inclusion. Four agreed to be approached by the researcher and to take part in the individual interviews. All were women, representing two arms of the trial (ONS and SC). Twelve staff participated in six focus groups, one at each care home. All participants were women, representing all three arms of the trial.

**Results** Major themes that emerged from both interviews and focus groups included: the perceived acceptability of trial involvement, the value of residents completing Participant Reported Outcome Measures (PROMs) and the challenges associated with outcomes measurement in this setting. Themes that emerged from the focus groups alone, included: the importance of individualising an intervention, and the perceived value of FB and ONS interventions and dietetic input.

**Conclusions** Residents and staff perceived involvement in a trial evaluating nutritional interventions to be acceptable, although the challenges associated with research in this setting were acknowledged. Resident preferences were highlighted by staff as an important consideration when implementing a nutrition support plan.

Trial registration number: Current Controlled Trials ISRCTN38047922 , Date assigned: 22 April 2014

### Strengths and Limitations of this study:

- This is the first study to inform understanding of the feasibility and acceptability of conducting a clinical trial evaluating nutritional interventions in the care home setting from the perspectives of staff and residents.
- Use of individual interviews gave each resident the chance to freely voice their views.
- The dynamic interaction of the staff focus groups were perceived by the researcher as open and positive, and provided insight into shared viewpoints within and between care home sites.
- The study was limited by small sample size, particularly with regards the number of residents interviewed, but a staff focus group was conducted at each care home site, providing representativeness from each arm of the trial, and capturing the views of both nursing and care staff.
- Exploration of staff experiences of feasibility and acceptability was carried out in engaged and motivated care homes, which may limit transferability to the national care home population.

**Acknowledgements** The participants in the study for sharing their experiences and views. Susan Boex, a carer, who supported the trial steering groups that provided an overview of the trial and the embedded qualitative study.

**Funding** This study was undertaken as a student project (RS was the MRes student), as part of the National Institute for Health Research (NIHR) Clinical Academic Training Programme for AHP's (Masters in Research). The study was self-funded and involved no research costs for the NHS trust sponsoring the research (The Heart of England NHS Foundation Trust).

**Competing Interests** None declared.

**Authors' contributions** RS designed the study, performed the interviews and focus groups and drafted the article. RS analysed the data following peer debriefing and agreement of the final themes with AR. AR and CS have made substantial contributions to the conception, design, and data interpretation of the study. All authors have read and approved the final manuscript.

**Data sharing statement** No further unpublished data are available.

## Introduction

Care home residents in the UK are a distinct group of approximately 416,000 people (including 16% of those aged over 85)[1] with different mortality[2], health status, and health and care needs[3] compared to individuals of the same age residing in their own homes. Research outcomes established for older adults living within their own homes cannot be considered valid for care home residents and cannot therefore be used to guide best practice.[4]

The public health and social care expenditure associated with malnutrition in England from 2011-2012, was estimated at £19.6 billion; 15% of the total expenditure on health and social care[5]. Approximately 30-42% of care home residents are estimated to be at risk of malnutrition[6-8] placing them at increased risk of infection and pressure ulcers, clinical complications and depression and reducing their overall quality of life.[9-10] There is a need therefore to improve the evidence based nutritional care provided to this population. However, research in care homes presents challenges, and consequently many studies exclude care home residents on the basis that their inclusion would present the team with ethical and practical dilemmas.[11] Recruitment difficulties due to physical and cognitive impairments[12] have been highlighted as a particular challenge, along with the consent process,[12-13] responding to family and carer concerns[12] and high attrition.[12, 14] Additional issues for the researcher can include data collection within a busy care home schedule and difficulties for staff in adhering to assigned interventions and methodological protocols.[12] These challenges have led to nutrition intervention trials often excluding those at highest risk of malnutrition, including residents with advanced dementia and immobility.[15-18]

Existing studies of nutrition interventions for malnutrition within this setting have also tended to use a quantitative approach, which whilst useful for determining quantitative outcomes such as nutrient intake and weight change, have provided limited information on resident and staff perspectives of nutritional care and the reasons why the care home environment poses challenges for the researcher. During the last 20 years, researchers have identified the need for employing a range of methodologies to enhance understanding of healthcare complexities and to ensure that disempowered groups are heard.[19] Exploring feasibility outcomes with trial participants is a way to ensure that resident and staff perspectives can be used to inform the design and conduct for future definitive trials in this complex research setting.

The aim of this study therefore, was to seek an in depth understanding of the experience of participating in a cluster randomised feasibility trial which evaluated nutritional interventions in the treatment of malnutrition.[8] The study had two objectives:

1. To examine perceptions of the acceptability of trial procedures (including the intervention protocol, outcome measures and data collection methods) with care home staff and residents.
2. To examine care home staff perspectives of nutritional interventions and dietetic care in the treatment of malnutrition.

## Methods

### Design and setting:

This study used a pragmatic, exploratory approach to qualitative research, embedded within a cluster randomised feasibility trial (ISRCTN38047922)[8] to understand the experience of participating in a trial investigating nutritional interventions in the treatment of malnutrition. The study used semi structured interviews with residents and focus groups with staff which were consistent with the exploratory aim of the study.[20] Topic guides (Table 1) were used to ensure that core questions were asked, whilst allowing for flexibility to follow up on novel information.[21] Due to the paucity of previous work in this area, a specific theoretical framework was not adopted. The study is reported in line with the Consolidated Criteria for Reporting Qualitative Research (COREQ).[22]

The feasibility trial was conducted within the West Midlands, in England where 17 care homes providing accommodation for older adults (over 65 years), were receiving regular dietetic input. This was being provided by the community nutrition support dietetic service where the lead researcher (female) (RS) was working as a dietitian at the time of the study. Purposive sampling was used to select and invite six, privately owned care homes with a diverse sample based on type of care provided (residential or nursing/nursing and residential) to take part in the trial. All care home sites were made aware that the trial was being conducted as part of a student MRes project by the Lead Researcher (RS). The care home sites were cluster randomised to provide standard care (SC) (n=2), food-based intervention (FB) (n=2) or oral nutritional supplement intervention (ONS) (n=2) for 6 months to residents identified with, or at risk of malnutrition. Outcomes were trial feasibility and the acceptability of the design, the nutritional interventions and the outcomes being assessed at 3 and 6-months. These included anthropometry, dietary intake, healthcare resource usage and participant reported outcome measures (PROMs).

### Ethical approval

The trial was approved by the West Midlands NHS Local Research Ethics Committee (Ref: 13/WM/0390) and the Research and Development Department of the Heart of England NHS Foundation Trust prior to commencement. The Research Ethics Committee felt that the inclusion of residents lacking capacity in the collection of PROMs and in the qualitative study could not be justified in accordance with the Mental Capacity Act (MCA).[23]. Within the care home setting, capacity is assessed by trained care home staff or the GP. Written consent for PROMS data collection and for the qualitative study was sought on an individual basis from eligible residents that had been assessed as having capacity. Residents were provided with a full explanation of their required participation alongside a Participant Information Sheet. They were given one week to ask questions and decide whether they would like to provide information on quality of life, health state and dietary satisfaction. Each resident was asked to sign a consent form for PROMs and to indicate whether they would like to be considered for the individual interviews in the qualitative study.

### Participants

#### Sampling and recruitment

Those residents with capacity to consent who had indicated on the trial consent form that they would like to be considered for individual interviews and had completed the 6-month

1  
2  
3 trial intervention (n=7), formed the sampling frame for potential inclusion. The care home  
4 staff made the initial approach to the 7 potential participants to discuss their involvement.  
5 Those that remained interested in participation (n=4) were introduced to the dietitian  
6 researcher (RS) to provide further verbal information and a written information sheet and  
7 consent form. The 3 residents that declined to take part did not give specific reasons to the  
8 care home staff.

9  
10 A focus group of staff (2-3) took place within each of the care home sites that had  
11 participated in the trial. Care home staff were selected on the basis that they had  
12 participated in the trial[24] and were provided with information sheets and consent forms.  
13 Six focus groups, covering all 3 arms of the trial were conducted.

### 14 15 16 **Semi-structured interviews:**

17  
18 The dietitian researcher (RS) conducted individual semi-structured interviews lasting 30 to  
19 60 minutes with care home residents to enable exploration of reality from narratives related  
20 to their own experiences of trial participation.[25] The interviews were organised around topic  
21 guides (Table 1), developed using the trial feasibility objectives and discussions with care  
22 home staff. The basic research question explored was the experience and acceptability of  
23 participation in the trial. Themes and core questions were refined following the 6-month  
24 dietary intervention and the collection of PROMs.

25 Interviews allowed for greater exploration of individual perceptions of the  
26 acceptability of the assigned intervention and understanding and perception of the  
27 anthropometric assessments and the PROMs questionnaires than would have been possible  
28 with the use of focus groups.[26-28] RS is an experienced nutrition support dietitian with an  
29 interest in malnutrition in the older adult population, and who had worked for several years  
30 with the care home population. This relevant background allowed for the effective  
31 exploration of individual dietary satisfaction whilst on the allocated nutritional intervention  
32 plan. Use of the interview technique enabled residents to ask for questions to be further  
33 explained, which allowed for the identification of any problems with comprehension and for  
34 questions to be rephrased as appropriate. This was felt to be important with the care home  
35 population and may have been less feasible within a group setting.[29] RS was responsible  
36 for audio taping the interviews, and transcribing the audio recordings verbatim.

### 37 38 **Focus Groups:**

39  
40 The dietitian researcher (RS,) led and audio-taped focus group discussions lasting 45-60  
41 minutes in each of the 6 care homes with between 2 and 3 care home staff in each. The  
42 topic guide (Table 1) was developed using the feasibility objectives from the trial alongside  
43 discussions with care home staff and was later refined following delivery of the 6-month  
44 nutritional intervention and collection of outcomes data. Focus groups were used to enable  
45 the views of more people to be included,[25] to highlight any variations in perspectives  
46 between the staff within each home and between care home types[30] and to collect  
47 information from those staff that were reluctant to be interviewed on their own or who felt  
48 they had less to contribute.[31-32] As the staff within a care home work closely together,  
49 holding a focus group within each individual home was found to stimulate engagement and  
50 discussion[31,33] and it was possible to explore knowledge, experiences and perceptions  
51 of participating in a trial, with a focus on the assigned intervention and protocol for delivery,  
52 the data collection process, the data collection tools and the outcomes from the trial. With  
53 a strong background in nutrition support within the care home setting and a working  
54 relationship with the care home staff as a dietetic practitioner, RS was able to appreciate  
55 the significance of the aspects discussed and to effectively follow up on the relevant  
56 points.[34] RS was responsible for transcribing the focus group audio recordings verbatim.

**Table 1: Topic Guides for semi-structured interviews and Focus Groups**

| <b>SEMI-STRUCTURED INTERVIEWS</b>                        |                                                                                                                                                                                                                                                                                                                                                                                                                                                                                                                      |
|----------------------------------------------------------|----------------------------------------------------------------------------------------------------------------------------------------------------------------------------------------------------------------------------------------------------------------------------------------------------------------------------------------------------------------------------------------------------------------------------------------------------------------------------------------------------------------------|
| <b>Stage</b>                                             | <b>Content</b>                                                                                                                                                                                                                                                                                                                                                                                                                                                                                                       |
| <b>Discussion on involvement in the trial</b>            | <ul style="list-style-type: none"> <li>- The clarity and acceptability of explanations and instructions before and during the trial- <i>Prompted for any examples where information was not clear, scope for improvement</i></li> </ul>                                                                                                                                                                                                                                                                              |
| <b>Discussion on the dietary plan received</b>           | <ul style="list-style-type: none"> <li>- The acceptability of the dietary plan- <i>Prompted on appetite, satisfaction with diet, compliance and whether intervention was always received</i></li> <li>- Positive and negative outcomes of the interventions- <i>Personal experiences</i></li> </ul>                                                                                                                                                                                                                  |
| <b>Discussion on the anthropometry assessments</b>       | <ul style="list-style-type: none"> <li>- Acceptability of the assessments undertaken- <i>Prompted for: understanding of instructions, personal experiences, suggestions to make the process more acceptable</i></li> </ul>                                                                                                                                                                                                                                                                                           |
| <b>Discussion on the PROMS questionnaires and scales</b> | <ul style="list-style-type: none"> <li>- The ease/burden of completing questionnaires and scales- <i>Prompted for time commitments, changes to routine, ways to make the process more acceptable</i></li> <li>- Understanding of the questionnaires/scales- <i>Prompted for any particular challenges, whether other residents could have completed</i></li> <li>- Thoughts on the importance of residents being able to provide feedback through PROMS</li> </ul>                                                   |
| <b>FOCUS GROUPS</b>                                      |                                                                                                                                                                                                                                                                                                                                                                                                                                                                                                                      |
| <b>Stage</b>                                             | <b>Content</b>                                                                                                                                                                                                                                                                                                                                                                                                                                                                                                       |
| <b>Discussion of care home involvement in the trial</b>  | <ul style="list-style-type: none"> <li>- The ease/burden of participation in the trial: <i>prompted for time commitments, knowledge and competency</i></li> <li>- The confidence of the staff in completing malnutrition screening- <i>prompted for areas of concern/adequacy of training prior to commencement</i></li> <li>- Experiences of completing healthcare resource usage questionnaires- <i>prompted for time commitment/specific challenges/any other items which could have been included</i></li> </ul> |
| <b>Discussion of allocated dietary intervention</b>      | <ul style="list-style-type: none"> <li>- The acceptability of the dietary plan for residents</li> <li>- The ease/burden of delivering the dietary intervention</li> <li>- Positive and negative outcomes of interventions- <i>according to study data, and own perceptions</i></li> <li>- Possible reasons for poor compliance</li> </ul>                                                                                                                                                                            |
| <b>Discussion of PROMs outcome measures</b>              | <ul style="list-style-type: none"> <li>- The ability of residents to complete the questionnaires and scales- <i>prompted for their thoughts on whether others could have completed, ways to make it easier, completion by proxy</i></li> </ul>                                                                                                                                                                                                                                                                       |

## Nutritional interventions and outcome measures

All six care homes had received training and support to provide a standard care intervention to residents with or at risk of malnutrition. The food-based intervention choices and recipes were based on local nutrition support guidelines, national guidance and best practice resources[35-36] and were intended to increase the participating resident's daily nutritional intake by approximately 600 kcal and 20-25g of protein. The Oral Nutritional Supplement (ONS) intervention consisted of 2 daily liquid ONS containing 600kcal and 24g protein.

The outcomes measured or collected in the trial by the care home staff included height, weight, Body Mass Index (BMI), healthcare resource usage, compliance with the assigned intervention and completion of the standardised mini-mental state examination (sMMSE). Participant-reported outcome measures (PROMs) data was collected from those residents that had capacity and had consented to completing quality of life and health state questionnaires and a Visual Analogue Scale (VAS) related to dietary satisfaction.

## Patient and Public Involvement

The care home residents involved in this study were not involved in the development of the research question, the outcome measures or the study design. However, the focus of the study and the development of the topic guides was informed via care home staff discussions and the insight of a carer, who supported the trial steering groups. Participants were recruited through the care homes that participated in the trial as described above. There are no plans to disseminate the qualitative study results to participants directly; however, results will be published in open-access peer review publications.

## Data Analysis

Interview and focus group discussions continued until no new emerging ideas were being obtained and it was felt that thematic data saturation had been reached with the study participants.[37] The qualitative data were analysed using the Krueger (1994)[38], and Ritchie and Spencer (1994)[39] framework analyses. The process of data analysis began during data collection, through the effective facilitation and audiotaping of the interview and focus group discussions. As RS undertook all of the interviews and focus groups, this reduced the time taken to become fully familiar with the data.[23] RS transcribed the audiotapes and then cross referenced the transcripts against the recordings for accuracy and to identify the major themes. Concepts, ideas and short phrases were identified within the text and were used to develop thematic frameworks. The initial frameworks and themes were informed by the study objectives and the structure of the topic guides and were developed through deductive analyses and the identification of subthemes. These were then refined, combined and developed by annotating the themes from the draft frameworks on the transcripts, further immersing RS in the data, and enabling the themes and sub-themes to be adjusted and made clearer.[23,40]

Once the frameworks had been refined, the data was indexed using a process of sorting, highlighting and arranging quotations (Using CH1 to CH6 to indicate the care home source and R1 to R4 to indicate the source of the resident interview quotations). At this stage, RS consulted with AR in a process of peer debriefing, to determine whether the themes and subthemes were appropriately clear and comprehensive and to agree the final frameworks.[41] The last stage of analysis involved mapping and interpreting the data, enabling comparison of themes and sub-themes and cross checking against the original transcripts and audio recordings to ensure appropriate context and enhancing rigour.[42] No further changes were made to the themes or subthemes at this stage.

Data collected from the staff focus groups and resident interviews for objective 1 were considered alongside each other, to identify perceptions about trial acceptability that were common to both sets of participants.

## Results

### Participants:

Twelve staff participants took part in six focus groups, one at each of the care home sites. All participants were women and all three arms of the trial were represented. The participants were all involved with the trial for the full 6-month intervention. The main reason for care home staff that had participated in the trial being unable to attend the focus groups was the busy care home schedule and staff shift patterns.

Four resident participants took part in the individual interviews. All participants were women and two arms of the trial were represented; the ONS arm and the SC arm. None of the residents approached by the dietitian researcher (RS) refused to participate in the interviews, or dropped out.

### Care home staff and residents perceptions of the acceptability of trial procedures:

The themes and subthemes identified from the care home staff focus group data and resident interview data are shown in Table 2, along with supporting quotations. Major themes that emerged from the data included: the perceived acceptability of being involved in the trial, the value of residents completing PROMs questionnaires and voicing their opinion, and the challenge of undertaking physical measurements and delivering an intervention protocol with some groups of residents.

8 staff participants commented that involvement in the trial did not pose an additional workload, although some participants stressed the importance of ensuring that all staff in the home were aware of the trial and what was required of them. The 4 resident participants did not consider taking part in the PROMs data collection to be a 'burden' with 2 of them commenting that it did not take up too much of their time. 6 staff participants indicated that they believed more of the residents could have completed the PROMs questionnaires within the trial, with one specifically making a positive reference to the COOP Quality of Life tool. 3 staff participants and all 4 resident participants commented on the usefulness of residents voicing their opinion through completion of these types of questionnaires.

8 staff participants commented on the challenge of undertaking physical measurements such as anthropometry, with care home residents and 4 commented on the challenges associated with delivering a nutritional intervention in this setting. Particular reference was made to the challenges posed by the fluctuating mood and capacity of many of the residents. The 4 resident participants commented on the acceptability of the physical measurements and the nutritional interventions, although it must be noted that these 4 residents all had capacity. 1 resident mentioned that mood might determine the acceptability of the measurements.



**Table 2: Identified themes and subthemes from care home staff and residents regarding their experiences of the trial procedures:**

| <b>CARE HOME STAFF</b>                                              |                                          |                                                                                                                                                                                                                                                                                                                                                                                                                                                                                                                                                                                                                                                                            |
|---------------------------------------------------------------------|------------------------------------------|----------------------------------------------------------------------------------------------------------------------------------------------------------------------------------------------------------------------------------------------------------------------------------------------------------------------------------------------------------------------------------------------------------------------------------------------------------------------------------------------------------------------------------------------------------------------------------------------------------------------------------------------------------------------------|
| <b>Theme</b>                                                        | <b>Subthemes</b>                         | <b>Direct Quotations</b>                                                                                                                                                                                                                                                                                                                                                                                                                                                                                                                                                                                                                                                   |
| <b>Perceived acceptability of involvement in the trial</b>          | Not viewed as additional work            | <p>'No different to usual at all' (CH1)</p> <p>'No additional work (collecting healthcare resource usage data)- all in the notes' (CH1)</p> <p>'I can't say that it was a hassle, we just treated it as we should do anyway' (CH2)</p> <p>'All the required information is documented in care plans anyway- not extra information' (CH2)</p> <p>'No, wasn't really any different...it's (SC) what we are doing anyway' (CH3)</p> <p>'Carers would be fortifying anyway, and working with the kitchen' (CH4)</p> <p>'I was happy that you chose us to be involved- it wasn't any extra work' (CH6)</p> <p>'It didn't seem like extra work- it was very organised' (CH1)</p> |
|                                                                     | Importance of all staff being made aware | <p>'We had a list in the kitchen to make it easy for staff to deliver the intervention' (CH2)</p> <p>'We put extra copies of the sheets (personalised dietetic FB plans) in the residents rooms to make sure the carers understood and knew what it was all about' (CH4)</p> <p>'Everyone had a list of the residents that needed the FB intervention, they also had all the recipes to follow, so it was not challenging' (CH6)</p> <p>'It was straightforward so long as staff knew to sign that they (ONS) had been given' (CH1)</p>                                                                                                                                    |
| <b>Staff completion of nutritional screening</b>                    | Confident in the process                 | <p>'Very confident in completing' (CH1)</p> <p>'We do the MUST (the seniors)- no problem with completing it' (CH2)</p> <p>'Staff are confident in doing this and knowing what to do next' (CH3)</p> <p>'I think we have gained more confidence in using MUST' (CH6)</p>                                                                                                                                                                                                                                                                                                                                                                                                    |
|                                                                     | The value of 'MUST' training             | <p>'I found it hard to begin with, but it's alright now we've had lots of training' (CH2)</p> <p>'We have a good knowledge now we've been trained' (CH5)</p> <p>'Further training on completing MUST is always useful' (CH4)</p> <p>'The only challenge is we don't always have heights, but now I know how to take the arm measurement (ulna length) if I can't get height' (CH5)</p>                                                                                                                                                                                                                                                                                     |
| <b>The challenge of undertaking physical measurements with care</b> | Fluctuating mood and capacity            | <p>'The patients were not refusing you because it was a study, they refuse to do things for us as well' (CH1)</p> <p>'It's dementia and it's really hard- it depends on the day' (CH2)</p>                                                                                                                                                                                                                                                                                                                                                                                                                                                                                 |

|                                                           |                                                           |                                                                                                                                                                                                                                                                                                                                                                                                                                                                                                                                                                                                                                                                                                                                                                                                                                                                                                                                                                                                                           |
|-----------------------------------------------------------|-----------------------------------------------------------|---------------------------------------------------------------------------------------------------------------------------------------------------------------------------------------------------------------------------------------------------------------------------------------------------------------------------------------------------------------------------------------------------------------------------------------------------------------------------------------------------------------------------------------------------------------------------------------------------------------------------------------------------------------------------------------------------------------------------------------------------------------------------------------------------------------------------------------------------------------------------------------------------------------------------------------------------------------------------------------------------------------------------|
| <p><b>home residents</b></p>                              |                                                           | <p>'It's a challenge of the care home setting' (CH3)<br/>         'It's just a challenge of care homes- If they refuse, they refuse' (CH4)<br/>         'it depends on the individual, not all of them will be weighed either' (CH5)<br/>         'Challenging in a care home- with people that have dementia, it depends on the day' (CH6)<br/>         'They behave differently at different times of the day' (CH6)<br/>         'Limitation of time- you are committed to come on that day- if the residents are having a bad day, you won't be able to get the measurements properly' (CH6)</p>                                                                                                                                                                                                                                                                                                                                                                                                                      |
|                                                           | <p>Potential for staff training</p>                       | <p>'Would be good if staff could be shown how to do these other measurements' (CH2)<br/>         'It might work better if staff could be trained to do these measurements' (CH4)<br/>         'If they can't do the weight, it would be good for staff to have more skills' (CH5)</p> <p>The challenge of delivering a nutritional intervention protocol in a care home:<br/>         The care home staff cited challenges including physical space for supplements, additional work for kitchen staff, and encouraging the residents to take the interventions<br/>         'It's quite hard to get the residents (with dementia) to have things every day, whatever it is' (CH2)<br/>         'There are a couple of residents that won't comply whatever the intervention' (CH4)<br/>         'Only negative we had was all the supplements arriving at the same time- we don't have that much space!' (CH1)<br/>         'There was more for the kitchen staff to do, but they didn't see it as extra work' (CH6)</p> |
| <p><b>Resident completion of PROMs questionnaires</b></p> | <p>Feasible for more residents to have completed them</p> | <p>'Some (residents without capacity) would be able to take part, but it depends on the day- are they having a good day?' (CH1)<br/>         'More of them could have completed them' (CH2)<br/>         'We have a couple on here that could have been able to answer these' (CH3)<br/>         'I like these (COOP QoL tool) , I've never seen these before- more residents could have completed them' (CH4)<br/>         'Not all of them, but yes 2 or 3 could have done' (CH5)<br/>         'Yes, they would have been able to complete these or tell you' (CH6)</p>                                                                                                                                                                                                                                                                                                                                                                                                                                                 |
|                                                           | <p>Value of more residents completing them</p>            | <p>'It would be nice for them to be able to give their thoughts' (CH2)<br/>         'Would be useful to know what they think...sometimes this generation like to just agree with everything' (CH3)<br/>         'I think it is important for more of the residents to have a say' (CH6)</p>                                                                                                                                                                                                                                                                                                                                                                                                                                                                                                                                                                                                                                                                                                                               |

| <b>RESIDENTS</b>                                                        |                                        |                                                                                                                                                                                                                                                                                                                                                                                                 |
|-------------------------------------------------------------------------|----------------------------------------|-------------------------------------------------------------------------------------------------------------------------------------------------------------------------------------------------------------------------------------------------------------------------------------------------------------------------------------------------------------------------------------------------|
| <b>Theme</b>                                                            | <b>Subthemes</b>                       | <b>Direct Quotations</b>                                                                                                                                                                                                                                                                                                                                                                        |
| <b>Perceived acceptability of taking part in PROMs data collection</b>  |                                        | <p>'Didn't take up much time, it was alright' (R1)</p> <p>'It was alright- not too much of a burden' (R2)</p> <p>'It was okay' (R3)</p> <p>'Don't think it's taken up much time' (R4)</p>                                                                                                                                                                                                       |
| <b>Completion of PROMs questionnaires</b>                               | Understanding of the tools             | <p>'Understood, was not complicated' (R1)</p> <p>'Fine as it was, no need to change them' (R1)</p> <p>'Yes, understood what you were asking me' (R2)</p> <p>'Yes, easy to understand' (R3)</p> <p>'They made sense' (R4)</p>                                                                                                                                                                    |
|                                                                         | Value of residents completing them     | <p>'Good to have a say, would be good if more residents could have done them' (R1)</p> <p>'It's nice to give an opinion if I can. Some of the other residents could have done them too' (R3)</p> <p>'It's very important to be asked about the food and your appetite' (R4)</p> <p>'Could have asked other residents the questions' (R2)</p>                                                    |
| <b>Perceived acceptability of the physical measurements</b>             |                                        | <p>'It was ok, not a hassle' (R1)</p> <p>'It was fine to take the measures in the bedrooms' (R1)</p> <p>'No trouble, but probably depends what mood I'm in!' (R2)</p> <p>'Yes, it was okay to do' (R3)</p> <p>'It (handgrip) was quite fun' (R3)</p> <p>'Yes, it was alright- it didn't hurt' (R4)</p>                                                                                          |
| <b>Perceived acceptability of the nutritional intervention protocol</b> | Disagreement regarding acceptability   | <p>'I Liked those' (ONS) (R1)</p> <p>'I liked the flavour and it was good that they were quite small' (compact supplements) (R1)</p> <p>'Quite liked them (ONS) when I did have them' (R3)</p> <p>'Yes it is acceptable (SC), I have extra glasses of milk' (R4)</p> <p>'I had one (ONS) a day, if I have two, they upset my stomach' (R2)</p> <p>'I think I prefer the homemade ones' (R2)</p> |
|                                                                         | No perceived impact of ONS on appetite | <p>'No, they were good for my appetite' (R3)</p> <p>'No they didn't reduce my appetite' (R2)</p> <p>'No effect on my appetite for meals' (R1)</p>                                                                                                                                                                                                                                               |

### Care home staff perspectives of nutritional interventions and dietetic care in the treatment of malnutrition:

The themes and subthemes identified from the care home staff focus group data are shown in Table 3, along with supporting quotations. Major themes that emerged from the data included: the importance of considering resident preference and the potential for personalised plans, the perceived value of FB and ONS interventions by staff and families and the perceived value of dietetic input.

7 staff participants commented on how resident preference influenced adherence to the intervention schedule, with 2 participants making reference to the importance of flexible and personalised approaches. 8 staff participants commented on the value of FB and ONS interventions, making reference to improvements in wellbeing, weight and behaviour. 2 of the participants also mentioned that the families of some of the residents viewed the FB and ONS interventions positively and would have liked them to continue beyond trial completion. 4 of the staff participants made reference to the value and usefulness of dietetic visits to the care home with 1 participant commenting that residents would do better with dietetic intervention.

| Theme                                                          | Subthemes                                            | Direct Quotations                                                                                                                                                                                                                                                                                                                                                                                                                                                                                                                                                                                                                                                                                                                                  |
|----------------------------------------------------------------|------------------------------------------------------|----------------------------------------------------------------------------------------------------------------------------------------------------------------------------------------------------------------------------------------------------------------------------------------------------------------------------------------------------------------------------------------------------------------------------------------------------------------------------------------------------------------------------------------------------------------------------------------------------------------------------------------------------------------------------------------------------------------------------------------------------|
| <b>The value of nutritional interventions for malnutrition</b> | Resident preference and personalisation              | 'We had one person who didn't like them (ONS), she just did not like the taste' (CH1)<br>'The majority of the residents liked them (ONS), there was one lady who just completely would not have it' (CH2)<br>'Would they do as well with snacks as drinks? I've been thinking about that- as they don't always take the snacks- it would depend on what the person preferred' (CH2)<br>'I think the extra homemade things is better, not everyone will drink the supplements' (CH6)<br>'Would be a good idea if the kitchen made their own milky drinks- could be a bit more flexible with that' (CH2)<br>'Personalised plans are better aren't they' (CH4)<br>'Glass of milk, with cream and chocolate powder as a smoothie- they enjoy it' (CH6) |
|                                                                | Perceived improvements with FB and ONS interventions | 'Improvement in resident's wellbeing, including mental wellbeing' (ONS) (CH1)<br>'Yes, expected weight to increase- usual food regime plus supplements' (CH1)<br>'Yes, would expect the weight to increase' (ONS) (CH2)<br>'I don't think they needed anything additional to FB intervention' (CH4)                                                                                                                                                                                                                                                                                                                                                                                                                                                |

1  
2  
3  
4  
5  
6  
7  
8  
9  
10  
11  
12  
13  
14  
15  
16  
17  
18  
19  
20  
21  
22  
23  
24  
25  
26  
27  
28  
29  
30  
31  
32  
33  
34  
35  
36  
37  
38  
39  
40  
41  
42  
43  
44  
45  
46  
47

|                                               |                                                                 |                                                                                                                                                                                                                                                                                                                                                                                                    |
|-----------------------------------------------|-----------------------------------------------------------------|----------------------------------------------------------------------------------------------------------------------------------------------------------------------------------------------------------------------------------------------------------------------------------------------------------------------------------------------------------------------------------------------------|
|                                               |                                                                 | <p>'Yes, I would like to think there would be an increase in weight with FB intervention' (CH4)</p> <p>'I think they would have benefitted by being in one of the other groups- FB or ONS' (CH5)</p> <p>'Some of the residents behaviour improved while they were in the trial' (ONS) (CH1)</p> <p>'I feel it was acceptable for the residents.....a lot of them want to continue' (ONS) (CH1)</p> |
|                                               | Perceived value of interventions from the families of residents | <p>'A lot of the families have asked if residents could continue supplements' (CH1)</p> <p>'Most of the residents accepted it (the FB intervention) as part of their diet plan- they were pleased to have something extra and the families were as well' (CH6)</p>                                                                                                                                 |
| <b>The value of dietetic-led intervention</b> |                                                                 | <p>'It's useful to be told specific things to do by the dietitian- extra things to add into the diet that you might not have thought of' (CH3)</p> <p>'We could have tried different things on discussion with you (dietitian)' (CH5)</p> <p>'Would think they would do better with dietetic intervention' (CH5)</p> <p>'It was a benefit to have the dietitian here more often' (CH6)</p>         |

Peer review only

## Discussion

### Care home staff and residents perceptions of the acceptability of trial procedures

This is the first study that has examined the perceptions of the acceptability of trial procedures in the care home setting with staff and residents, a topic which has not previously been explored within the literature. Consideration of the data gathered from the focus groups and semi-structured interviews for objective one highlighted some common themes for both those that reside in and those that work in the care homes. Both the staff and residents felt their involvement in the trial to be acceptable. It was not viewed as creating additional work for the staff, and the residents perceived it to take up little of their time. The use of PROMs to assess self-perceived quality of life and health state and as a means of enabling residents to voice their opinion of the food and nutritional interventions was viewed as positive and of value to the trial, with the tools and questionnaires perceived as acceptable for residents to complete. Both groups of participants felt that more of the residents that took part in the trial could have completed the PROMs. The restrictions imposed by the approving REC meant that those residents lacking capacity were excluded from the collection of this data on the basis that their involvement would not benefit other people with the same or similar impairing condition.[8,36] The perceived acceptability of the tools by staff and residents in this study supports the future assessment of feasibility and acceptability with a more representative care home population, giving scope to investigate the relationship between nutrition support and PROMs and to further explore resident experience of mealtimes and interventions, both areas that have been highlighted within the literature as requiring further research within this setting.[43-44]

Staff noted the value in finding out what the residents think through the use of PROMs, with one stating that 'sometimes this generation like to agree with everything'. Care home residents have been described previously within the literature as 'silent recipients of care',[45] tending not to highlight concerns or make clear their preferences, either due to cognitive impairment or because of the cultural norms of their generation.[46] The use of tools and questionnaires within the care home setting may provide residents with a non-verbal means of expressing their opinions of care and may assist in the effective delivery of person-centred health and social care, as advocated by the Care Quality Commission.[47] The tendency 'to agree' may also explain the 'directness' of the quotes obtained from the resident participants during interviews, even following probing for expansion on particular points. It is possible that the residents may have been reticent to raise concerns or negative points about their involvement in the trial, perhaps introducing an element of response bias and limiting the depth of understanding of resident experiences that could be achieved in this study.

Despite the perceived acceptability of involvement in the trial, the care home staff highlighted the challenges associated with taking physical measurements with residents and delivering a nutritional intervention protocol in this setting. These barriers included fluctuating mood and capacity of some residents, as well as reference to the high proportion of residents with a primary diagnosis of dementia (75%).[8] Other trials conducted in populations with fluctuating capacity have noted similar challenges when taking measurements such as Tricep Skinfold Thickness[48] and handgrip strength.[43,49] Whilst the residents interviewed felt that the physical measurements were acceptable and not deemed to be time consuming, one resident mentioned that daily mood and individual preferences can sometimes result in a lack of acceptance with an assessment schedule or an intervention.

A theme that emerged only from staff focus groups was the interest in care home staff receiving training to enable them to take anthropometric and functionality measures including Mid Upper Arm Circumference, Tricep Skinfold Thickness and Handgrip strength.

1  
2  
3 Some felt that this might have been useful within the trial, as a means of enabling  
4 measurements to be taken when residents were in a better mood, or having a good day.  
5 Others felt that it would be helpful for staff to be upskilled in this way outside of the trial  
6 setting, to support in their assessment of nutritional status. The emergence of this theme  
7 may be related to the perceived value placed on nutritional screening ('MUST') training by  
8 the staff, and their subsequent self-perceived confidence and competence in completing  
9 resident screening as part of usual care. Improvements in 'MUST' documentation and  
10 accuracy following dietetic-led projects are supported within the literature.[50-51] The  
11 interest from staff to expand their skill base could provide scope to introduce more  
12 comprehensive staff-led assessments of nutritional status within the care home setting.  
13 There are however, challenges associated with taking these measurements, including  
14 measurement error due to poor technique and substantial differences when measurements  
15 are made on the same individual by different observers.[52] If such an approach were to be  
16 implemented in practice, it would require a standardised protocol and regular training  
17 updates.

### 18 19 **Care home staff perspectives of nutritional interventions and dietetic care in** 20 **the treatment of malnutrition** 21

22 A major theme which emerged from the focus group data was the perceived value placed by  
23 staff on the nutritional interventions, both food-based (FB) and oral nutritional supplements  
24 (ONS), when compared to the standard nutritional care provided by the homes. A common  
25 perception amongst the staff was that they would expect the introduction of either  
26 intervention to be associated with improved outcomes, particularly weight. They also noted  
27 that the families of residents involved in the trial viewed the interventions as valuable and  
28 wished the residents to continue beyond the assigned protocol. Good staff knowledge of the  
29 nutritional interventions available to address malnutrition, and a positive attitude towards  
30 these interventions has been shown previously in the literature,[53-54] demonstrating that  
31 this is perhaps an aspect of nutritional care that is familiar to care home staff and is therefore  
32 perceived to be of value.

33 Another theme which emerged from the focus groups was the perceived value of  
34 dietetic input, with some staff expressing the opinion that residents requiring nutrition support  
35 'would do better with dietetic intervention' and others mentioning that it was of benefit to  
36 have the dietitian visit the home more often. Previous research focusing on the knowledge of  
37 care home staff has highlighted the greatest knowledge deficits to be associated with  
38 nutrient and food requirements in older adults,[53,55] which perhaps explains the value  
39 placed on dietetic expertise by care home staff in this study. As the nutritional interventions  
40 used in this trial were delivered by the dietitian, an interesting area for future research, might  
41 be to explore the care home staff perceptions of the nutritional interventions (FB or ONS)  
42 when delivered without dietetic input.

43 A prominent sub-theme that emerged in relation to the nutritional interventions was  
44 the importance placed by staff on resident preferences and the scope to provide a  
45 personalised plan. This sub-theme illustrates a commonality with the feedback provided by  
46 residents when discussing the acceptability of the interventions, with some expressing a  
47 preference for certain types of oral nutritional supplements and others stating that they would  
48 have preferred a homemade drink. The importance of involving residents in decisions about  
49 their care, including nutrition and mealtimes has been highlighted by the British Geriatrics  
50 Society (2011)[56] and has been shown to be positively associated with quality of life.[57] A  
51 recent study by Watkins et al (2017),[58] which used semi-structured interviews to explore  
52 resident's experiences of mealtimes concluded that freedom of choice is a key component  
53 of their experiences of care. Whilst it may not always be possible for residents to make  
54 decisions on all aspects of their care, it is apparent from this study that resident preferences  
55 should be considered alongside clinical reasoning when implementing a nutrition support  
56 plan. The individualisation of an intervention to suit a client's needs is a core component of  
57

1  
2  
3 the shared decision making underpinning dietetic practice as outlined within the British  
4 Dietetic Association's 'Model and Process for Nutrition and Dietetic Practice'.<sup>[59]</sup> This study  
5 highlights the importance of this approach within the care home setting.  
6

## 7 **Strengths and limitations**

8  
9 A key strength of this study is that it is the first to inform understanding of the feasibility and  
10 acceptability of conducting a clinical trial evaluating nutritional interventions in the care home  
11 setting, by exploring the opinions and perspectives of the staff and the residents involved in  
12 the trial. The inclusion of care home residents, highlighted as an underrepresented group  
13 within the research literature<sup>[12]</sup> has added to our understanding of their experiences of  
14 being involved with research and of nutritional care within this setting. Use of individual  
15 interviews gave each resident the chance to freely voice their views. The dynamic interaction  
16 of the staff focus groups were perceived by the researcher as open and positive, and  
17 provided insight into shared viewpoints within and between care home sites.

18 A limitation of this study is the small sample size, particularly with regards the  
19 number of residents interviewed. The views held by this small sample of residents, who were  
20 all female and had capacity, may not be representative of the other residents that took part  
21 in the trial and may limit the depth of understanding of resident experiences that can be  
22 gained from this study. There was a lack of representation from residents in the FB  
23 intervention arm, but a staff focus group was conducted at each care home site, therefore  
24 providing representativeness from staff in each arm of the trial, and capturing the views of  
25 both nursing and care staff. The directness of quotes obtained from the resident participants  
26 has already been commented on, but this was also found to be a feature of the staff focus  
27 groups, despite the perceived positive engagement of the participants. The lack of extensive  
28 discussion may have been a consequence of the focus groups being held at the care home  
29 sites, necessitating the balance of research activities alongside extremely busy care  
30 roles<sup>[60]</sup> The experience of trial involvement also appeared to have been largely acceptable  
31 to the care home staff. It is possible that they may have had more to say had they been  
32 dissatisfied with the experience or felt that it had increased their workload.  
33

34 It is possible that the care homes recruited into this study do not necessarily  
35 represent the national care home population. All sites had been in receipt of long-term and  
36 regular input from the local dietetic service and were engaged in a programme of staff  
37 training. The dietitian researcher (RS) had an established relationship with the managers  
38 and staff at the homes, which may have made it easier to recruit to and facilitate the staff  
39 focus groups. This relationship may also have influenced the participants in giving what  
40 would be perceived as more desirable responses. However, with the focus on the  
41 exploration of feasibility outcomes to ensure that resident and staff perspectives can be used  
42 to inform the design and conduct of future definitive trials, there was not felt to be a desired  
43 outcome of this study and the participants were encouraged to say how they really felt.  
44 The exploration of staff experiences of feasibility and acceptability was carried out in  
45 engaged and motivated care homes, which may limit transferability. However, the focus  
46 groups and interviews have informed our understanding of the experiences of trial  
47 involvement and the perceived acceptability and value of nutritional interventions from the  
48 perspectives of both care home staff and residents.  
49

## 50 **Conclusions**

51  
52  
53 From staff focus groups and interviews with residents, involvement in a clinical trial  
54 evaluating nutritional interventions for malnutrition in the care home setting was perceived as  
55 acceptable, although the challenges associated with research in this setting were  
56 acknowledged. Both staff and residents agreed that the use of PROMs within the trial was  
57



1  
2  
3 positive and valuable and that more residents could have completed them. Care home staff  
4 demonstrated a positive attitude towards both the nutritional interventions used in the trial,  
5 and the value added by dietetic input. Resident preferences were identified as important,  
6 because they are likely to affect compliance with an intervention. To ensure that these are  
7 accounted for, it is suggested that a nutrition support plan be developed collaboratively  
8 between the dietitian and the staff, the resident and their relatives, to meet both the clinical  
9 needs and the preferences of the individual.  
10  
11  
12  
13  
14  
15  
16  
17  
18  
19  
20  
21  
22  
23  
24  
25  
26  
27  
28  
29  
30  
31  
32  
33  
34  
35  
36  
37  
38  
39  
40  
41  
42  
43  
44  
45  
46  
47  
48  
49  
50  
51  
52  
53  
54  
55  
56  
57  
58  
59  
60

For peer review only

## References:

1. LaingBuisson. Care of Older People: UK Market Report, 27th edition. 2015  
[http://www.laingbuisson.co.uk/Portals/1/MarketReports/Documents/Care\\_OlderPeople\\_27ed\\_Bro\\_WEB.pdf?ver=2015-09-29-162653-327](http://www.laingbuisson.co.uk/Portals/1/MarketReports/Documents/Care_OlderPeople_27ed_Bro_WEB.pdf?ver=2015-09-29-162653-327) (Accessed 04 February 2018).
2. Nimmo AW, Peterkin G, Coid DR. Mortality in general practice: Problems concerning deaths in institutions. *Public Health* 2006;126:671.
3. Sinclair AJ, Gadsby R, Penfold A, et al. Prevalence of diabetes in care home residents. *Diabetes Care* 2001;24:1066-8.
4. Bayer A, Todd W. Unjustified exclusion of elderly people from studies submitted to research ethics committee for approval: descriptive study. *Br Med J* 2000;321(7267):992-993.
5. Elia M. The cost of malnutrition in England and potential cost savings from nutritional interventions. Malnutrition Action Group of BAPEN and the National Institute for Health Research Southampton Biomedical Research Centre. 2015  
<http://www.bapen.org.uk/pdfs/economic-report-full.pdf> (Accessed 04 February 2018)
6. Russell CA, Elia M. Nutrition Screening Survey in the UK and Republic of Ireland. BAPEN. 2010 <http://www.bapen.org.uk/pdfs/nsw/nsw10/nsw10-report.pdf> (Accessed 01 December, 2017).
7. Parsons EL, Elia M, Cawood AL. Randomised controlled trials shows greater total nutritional intakes with liquid supplements than dietary advice in care home residents. *Clin Nutr Supp* 2011;6(1):1.
8. Stow R, Ives N, Smith C, Rick C, Rushton A. A cluster randomised feasibility trial evaluating nutritional interventions in the treatment of malnutrition in care home adult residents. *Trials* 2015;16:433.
9. Arvanitakis M, Coppens P, Doughan L, Van Gossum A. Nutrition in care homes and home care: Recommendations- a summary based on the report approved by the Council of Europe. *Clin Nutr* 2009;28:492-6.
10. Meijers J, Halfens RJ, Wilson L, Schols JM. Estimating the costs associated with malnutrition in Dutch nursing homes. *Clin Nutr* 2012;31:65-8.
11. Watts G. Why the exclusion of older people from clinical research must stop. *Br Med J* 2012;344:e3445
12. Maas M, Kelley L, Park M, Specht JP. Issues in conducting research in nursing homes. *West J Nurs Res* 2002;4:373-89.
13. Hall S, Longhurst S, Higginson IJ. Challenges to conducting research with older people living in nursing homes. *BMC Geriatr* 2009;9:38.
14. Ridda I, Lindley R, Macintyre R. The challenges of clinical trials in the exclusion zone: the case of the frail elderly. *Australas J Ageing* 2008;27(2):61-66.
15. Fiatarone Singh MA, Bernstein MA, Ryan AD, et al. The effect of oral nutritional supplements on habitual dietary quality and quantity in frail elders. *J Nutr Health Aging* 2000;4:5-12.
16. Smoliner C, Norman K, Scheufele R, et al. Effects of food fortification on nutritional and functional status in frail elderly nursing home residents at risk of malnutrition. *Nutrition* 2008;24:1139-44.
17. Manders M, de Groot CP, Blauw YH, et al. Effect of a nutrient-enriched drink on dietary intake and nutritional status in institutionalized elderly. *Eur J Clin Nut* 2009;63:1241-50.
18. Lee LC, Tsai AC, Wang JY. Need-based intervention is an effective strategy for improving the nutritional status of older people living in a nursing home: A randomized controlled trial. *Int J Nurs Stud* 2013;50:1580-8.
19. O'Cathain A, Murphy E, Nicholl J. Why, and how, mixed methods research is undertaken in health services research in England: a mixed methods study. *BMC Health Serv Res* 2007;7:85
20. Pope C, Mays N. Reaching the parts other methods cannot reach: an introduction to qualitative methods in health and health services research. *BMJ* 1995;311:42-5.

21. Barriball LK, While A. Collecting data using a semi-structured interview: a discussion paper. *J Adv Nurs* 1994;19:328-35.
22. Tong A, Sainsbury P, Craig J. Consolidated criteria for reporting qualitative research (COREQ): a 32-item checklist for interviews and focus groups. *Int J Qual Health Care* 2007;19:349-57.
23. Department of Health. Mental Capacity Act 2005. 2005 [http://www.dh.gov.uk/en/Publicationsandstatistics/Publications/PublicationsPolicyAndGuidance/DH\\_4137745](http://www.dh.gov.uk/en/Publicationsandstatistics/Publications/PublicationsPolicyAndGuidance/DH_4137745) (Accessed 07 November 2017).
24. Richardson CA, Rabiee F. 'A Question of Access' – an exploration of the factors influencing the health of young males aged 15–19 living in Corby and their use of health care services. *Health Educ J* 2001;60:3-6.
25. Ritchie J, Lewis J. Qualitative research practice: a guide for social science student and researchers. London: Sage 2003.
26. Chilban J. Interviewing in depth: the interactive-relational approach. Thousand Oaks CA: Sage 1996.
27. Johnson J. In-depth interviewing. In Gubrium J, Holstein J, eds. Handbook of Qualitative Research. Thousand Oaks, CA: Sage 2002:19-103.
28. Rubin H, Rubin J. Qualitative Interviewing: The Art of Hearing Data. Thousand Oaks CA: Sage Publications 2005
29. Bryman A. Social Research Methods. Oxford: Oxford University Press 2004.
30. Rabiee F. Focus-Group interview and data analysis. *Proc Nutr Soc* 2004;63:655-660.
31. Kitzinger J. Qualitative Research: Introducing focus groups. *Br Med J* 1995;311:299-302.
32. Hudson P, Aranda S, McMurray N. Intervention development for enhanced lay palliative caregiver support. *Eur J Cancer Care* 2002;11:262-270.
33. Lane P, McKenna H, Ryan A, et al. Focus group methodology. *Nurse Res* 2001;8(3):45-59
34. Kreuger A, Casey M. Focus groups: a practical guide for applied research. London: Sage Publications 2000
35. National Institute for Health and Clinical Excellence. CG32 Nutrition Support in Adults: oral nutrition support, enteral tube feeding and parenteral nutrition. 2006 <http://guidance.nice.org.uk/CG32/niceguidance/pdf/English> (Accessed 05 December 2017).
36. Malnutrition pathway. Managing Adult Malnutrition in the Community. 2012 <http://www.malnutritionpathway.co.uk> (Accessed 01 April 2013).
37. Kerr C, Nixon A, Wild D. Assessing and demonstrating data saturation in qualitative inquiry supporting patient-reported outcomes research. *Expert Rev Pharmacoecon Outcomes Res* 2010;10(3):269-281.
38. Krueger RA. Focus Groups: A practical guide for applied research. Thousand Oaks, CA: Sage Publications 1994.
39. Ritchie J, Spencer L. Qualitative data analysis for applied policy research. In Bryman A, Burgess RG, eds. Analysing Qualitative Data. London: Routledge 1994.
40. Braun V, Clarke, V. Using thematic analysis in psychology. *Qual Res Psychol* 2006;3:77-101.
41. King N. Using templates in the thematic analysis of text. In Cassell C, Symon G, eds. Essential guide to qualitative methods in organisational research. London, UK: Sage 2004:257-270.
42. Ezzy D. Qualitative Analysis Practice and Innovation. London: Routledge 2002
43. Stange I, Bartramb M, Liao YB, et al. Effects of a Low-Volume, Nutrient- and Energy-Dense Oral Nutritional Supplement on Nutritional and Functional Status: A Randomized, Controlled Trial in Nursing Home Residents. *JAMDA* 2012;14:628.e1-8.
44. Watkins R, Goodwin VA, Abbott RA, et al. Attitudes, perceptions and experiences of mealtimes among residents and staff in care homes for older adults: A systematic review of the qualitative literature. *Geriatr Nurs*. 2017;38(4):325-333
45. Reimer HD, Keller HH. Mealtimes in Nursing Homes: Striving for Person-Centred Care. *J*

- 1  
2  
3 *Nutr Elder* 2009;28(4):22.
- 4 46. Sidenvall B. Meal procedures in institutions for elderly people: a theoretical  
5 interpretation. *J Adv Nurs* 1999;30(2):319–28.
- 6 47. Care Quality Commission. The State of Health Care and Adult Social Care in England:  
7 Key themes and quality of services in 2009. The Stationery Office. 2010  
8 [https://www.gov.uk/government/uploads/system/uploads/attachment\\_data/file/229162/03](https://www.gov.uk/government/uploads/system/uploads/attachment_data/file/229162/0343.pdf)  
9 [43.pdf](https://www.gov.uk/government/uploads/system/uploads/attachment_data/file/229162/0343.pdf) (Accessed 08 December 2017).
- 10 48. Waninge A, van der Weide W, Evenhuis IJ, et al. Feasibility and reliability of body  
11 composition measurements in adults with severe intellectual and sensory disabilities. *J*  
12 *Intellect Disabil Res* 2009;53(4):377–388.
- 13 49. Hoppitt T, Sackley C, Wright C. Finding the right outcome measures for care home  
14 research. *Age Ageing* 2010;39:119–22.
- 15 50. Cawood AL, Smith A, Dalrymple-Smith JR, et al. Prevalence of malnutrition and use of  
16 nutritional support in Peterborough Primary Care Trust. *J Hum Nutr Diet* 2008;21(4):384
- 17 51. Woodcock CL, Jukes K, Davies S. Tailored training on screening for malnutrition using  
18 the ‘Malnutrition Universal Screening Tool’ (‘MUST’) and management plans improves  
19 screening accuracy and documentation in care homes in West Sussex. *Proc Nutr Soc*  
20 2001;70(OCE5): E257.
- 21 52. Ulijaszek SJ, Kerr DA. Anthropometric measurement error and the assessment of  
22 nutritional status. *Br J Nutr* 1999;82:165–77.
- 23 53. Beattie E, O’Reilly M, Strange E, et al. How much do residential aged care staff  
24 members know about the nutritional needs of residents? *Int J Older People Nurs*  
25 2013;9(4):54–64
- 26 54. Bauer S, Halfens RJG, Lohrmann CJ. Knowledge and attitudes of nursing staff towards  
27 malnutrition care in nursing homes: A multicentre cross-sectional study. *Nutr Health*  
28 *Aging* 2015;19:734.
- 29 55. Crogan NL, Shultz JA, Massey LK. Nutrition knowledge of nurses in long-term care  
30 facilities. *J Contin Educ Nurs* 2001;32:171–176.
- 31 56. British Geriatrics Society. Quest for Quality. 2011  
32 [http://www.bgs.org.uk/campaigns/carehomes/quest\\_quality\\_care\\_homes.pdf](http://www.bgs.org.uk/campaigns/carehomes/quest_quality_care_homes.pdf) (Accessed  
33 07 November 2017).
- 34 57. Philpin S, Merrell J, Warring J, et al. Memories, identity and homeliness: The social  
35 construction of mealtimes in residential care homes in South Wales. *Ageing Soc*  
36 2014;34(5):753–89.
- 37 58. Watkins R, Goodwin V, Abbott R, et al. Exploring residents’ experiences of mealtimes in  
38 care homes: A qualitative interview study. *BMC Geriatrics* 2017;17:141.
- 39 59. British Dietetic Association. Model and Process for Nutrition and Dietetic Practice.  
40 Birmingham: BDA 2016.
- 41 60. Shepherd V, Nuttall J, Hood K, et al. Setting up a clinical trial in care homes: challenges  
42 encountered and recommendations for future research practice. *BMC Res Notes* 2015;8:  
43 306.
- 44  
45  
46  
47  
48  
49  
50  
51  
52  
53  
54  
55  
56  
57  
58  
59  
60

## COREQ (COnsolidated criteria for REporting Qualitative research) Checklist

A checklist of items that should be included in reports of qualitative research. You must report the page number in your manuscript where you consider each of the items listed in this checklist. If you have not included this information, either revise your manuscript accordingly before submitting or note N/A.

| Topic                                          | Item No. | Guide Questions/Description                                                                                                                              | Reported on Page No. |
|------------------------------------------------|----------|----------------------------------------------------------------------------------------------------------------------------------------------------------|----------------------|
| <b>Domain 1: Research team and reflexivity</b> |          |                                                                                                                                                          |                      |
| <i>Personal characteristics</i>                |          |                                                                                                                                                          |                      |
| Interviewer/facilitator                        | 1        | Which author/s conducted the interview or focus group?                                                                                                   |                      |
| Credentials                                    | 2        | What were the researcher's credentials? E.g. PhD, MD                                                                                                     |                      |
| Occupation                                     | 3        | What was their occupation at the time of the study?                                                                                                      |                      |
| Gender                                         | 4        | Was the researcher male or female?                                                                                                                       |                      |
| Experience and training                        | 5        | What experience or training did the researcher have?                                                                                                     |                      |
| <i>Relationship with participants</i>          |          |                                                                                                                                                          |                      |
| Relationship established                       | 6        | Was a relationship established prior to study commencement?                                                                                              |                      |
| Participant knowledge of the interviewer       | 7        | What did the participants know about the researcher? e.g. personal goals, reasons for doing the research                                                 |                      |
| Interviewer characteristics                    | 8        | What characteristics were reported about the interviewer/facilitator? e.g. Bias, assumptions, reasons and interests in the research topic                |                      |
| <b>Domain 2: Study design</b>                  |          |                                                                                                                                                          |                      |
| <i>Theoretical framework</i>                   |          |                                                                                                                                                          |                      |
| Methodological orientation and Theory          | 9        | What methodological orientation was stated to underpin the study? e.g. grounded theory, discourse analysis, ethnography, phenomenology, content analysis |                      |
| <i>Participant selection</i>                   |          |                                                                                                                                                          |                      |
| Sampling                                       | 10       | How were participants selected? e.g. purposive, convenience, consecutive, snowball                                                                       |                      |
| Method of approach                             | 11       | How were participants approached? e.g. face-to-face, telephone, mail, email                                                                              |                      |
| Sample size                                    | 12       | How many participants were in the study?                                                                                                                 |                      |
| Non-participation                              | 13       | How many people refused to participate or dropped out? Reasons?                                                                                          |                      |
| <i>Setting</i>                                 |          |                                                                                                                                                          |                      |
| Setting of data collection                     | 14       | Where was the data collected? e.g. home, clinic, workplace                                                                                               |                      |
| Presence of non-participants                   | 15       | Was anyone else present besides the participants and researchers?                                                                                        |                      |
| Description of sample                          | 16       | What are the important characteristics of the sample? e.g. demographic data, date                                                                        |                      |
| <i>Data collection</i>                         |          |                                                                                                                                                          |                      |
| Interview guide                                | 17       | Were questions, prompts, guides provided by the authors? Was it pilot tested?                                                                            |                      |
| Repeat interviews                              | 18       | Were repeat interviews carried out? If yes, how many?                                                                                                    |                      |
| Audio/visual recording                         | 19       | Did the research use audio or visual recording to collect the data?                                                                                      |                      |
| Field notes                                    | 20       | Were field notes made during and/or after the interview or focus group?                                                                                  |                      |
| Duration                                       | 21       | What was the duration of the interviews or focus group?                                                                                                  |                      |
| Data saturation                                | 22       | Was data saturation discussed?                                                                                                                           |                      |
| Transcripts returned                           | 23       | Were transcripts returned to participants for comment and/or                                                                                             |                      |

| Topic                                  | Item No. | Guide Questions/Description                                                                                                        | Reported on Page No. |
|----------------------------------------|----------|------------------------------------------------------------------------------------------------------------------------------------|----------------------|
|                                        |          | correction?                                                                                                                        |                      |
| <b>Domain 3: analysis and findings</b> |          |                                                                                                                                    |                      |
| <i>Data analysis</i>                   |          |                                                                                                                                    |                      |
| Number of data coders                  | 24       | How many data coders coded the data?                                                                                               |                      |
| Description of the coding tree         | 25       | Did authors provide a description of the coding tree?                                                                              |                      |
| Derivation of themes                   | 26       | Were themes identified in advance or derived from the data?                                                                        |                      |
| Software                               | 27       | What software, if applicable, was used to manage the data?                                                                         |                      |
| Participant checking                   | 28       | Did participants provide feedback on the findings?                                                                                 |                      |
| <i>Reporting</i>                       |          |                                                                                                                                    |                      |
| Quotations presented                   | 29       | Were participant quotations presented to illustrate the themes/findings?<br>Was each quotation identified? e.g. participant number |                      |
| Data and findings consistent           | 30       | Was there consistency between the data presented and the findings?                                                                 |                      |
| Clarity of major themes                | 31       | Were major themes clearly presented in the findings?                                                                               |                      |
| Clarity of minor themes                | 32       | Is there a description of diverse cases or discussion of minor themes?                                                             |                      |

Developed from: Tong A, Sainsbury P, Craig J. Consolidated criteria for reporting qualitative research (COREQ): a 32-item checklist for interviews and focus groups. *International Journal for Quality in Health Care*. 2007. Volume 19, Number 6: pp. 349 – 357

**Once you have completed this checklist, please save a copy and upload it as part of your submission. DO NOT include this checklist as part of the main manuscript document. It must be uploaded as a separate file.**
